# Supplementary material for: Oxidation-dependent Lewis acidity in chalcogen adducts of Sb/P frustrated Lewis pairs
Source: Royal Society of Chemistry journal article supplement (doi:10.1039/d4dt01591f), 2024-01-01
Supplement: d4dt01591f1.pdf [file d4dt01591f1.pdf]

Supporting Information

**Oxidation and Lewis Acidity Dependent Deformation of Sb/P Frustrated Lewis Pair Adducts to Chalcogens**

Jonas Kriefft, Beate Neumann, Hans-Georg Stammler and Norbert W. Mitzel\*

\*Corresponding Author.

Chair of Inorganic and Structural Chemistry, Center for Molecular Materials CM<sub>2</sub>

Faculty of Chemistry, Bielefeld University

Universitätsstraße 25, 33615 Bielefeld (Germany)

E-mail: mitzel@uni-bielefeld.de

## **Table of Contents**

Experimental Procedures

NMR spectroscopy data

Crystallographic Data

References

## Experimental Procedures

### General Information

All operations involving air- and moisture-sensitive substances were performed under conventional Schlenk techniques or in a glove box with argon as inert gas. Volatile compounds were handled in a vacuum line. All solvents (*n*-hexane, toluene, benzene- $d_6$  dried over Na/K alloy; dichloromethane over calcium hydride; cyclopentane and dichloromethane- $d_2$  dried over molecular sieves) were distilled and degassed prior use.  $(F_5C_2)_2SbCH_2P(tBu)_2$  was prepared according to literature.<sup>1</sup> The other chemicals ( $N_2O$  (food grade),  $S_8$  ( $\geq 99\%$ , sublimed before use), Se (powder, 99+ %), Te (powder, 99.5 %), *o*-chloranil (97 %)) are commercially available and were used without further purification unless otherwise stated. NMR spectra were recorded using a Bruker Avance III 600 spectrometer at ambient conditions. NMR spectroscopic chemical shifts were referenced to the residual proton or carbon peaks of the solvent ( $CD_2Cl_2$ :  $^1H$ : 5.32 ppm,  $^{13}C$ : 54.0 ppm) or externally ( $^{19}F$ :  $CFCl_3$ ,  $^{31}P$ : 85%  $H_3PO_4$  in  $H_2O$ ). EI-MS was performed on a Shimadzu GCMS-QP2020 NX mass spectrometer in positive mode. Samples were introduced by a push rod in aluminium crucibles (direct inlet method). Elemental analyses were performed by staff at the University of Bielefeld using a HEKATECH EURO Element Analyser. SC-XRD was performed on a Rigaku Supernova diffractometer using Cu-K $\alpha$  or Mo-K $\alpha$  radiation.

### Syntheses

#### $(F_5C_2)_2SbCH_2P(O)(tBu)_2$ (**2**):

$N_2O$  (3 mmol) was condensed onto a degassed ( $3 \times$  freeze-pump-thaw) solution of **1** (0.26 g, 0.50 mmol) in *n*-hexane (5 mL). The thawed solution was stirred overnight at room temperature. A colourless solid crystallised at  $-78\text{ }^\circ C$ , which was washed with *n*-hexane ( $3 \times 1$  mL) after removal of the mother liquor. The solid was dried under vacuum. The needle-shaped crystals of **2** (0.27 g, 0.50 mmol, quant.) were suitable for X-ray diffraction.

#### Analytical data:

$^1H$  NMR (600 MHz,  $CD_2Cl_2$ ):  $\delta$  [ppm] = 2.66 (d,  $^2J_{P,H} = 6$  Hz, 2H,  $CH_2$ ), 1.29 (d,  $^3J_{P,H} = 14$  Hz, 18H,  $C(CH_3)_3$ ).

$^{13}C\{^1H\}$  NMR (151 MHz,  $CD_2Cl_2$ ):  $\delta$  [ppm] = 122.9 (m,  $CF_2$ ), 120.5 (qt,  $^1J_{F,C} = 284$  Hz,  $^2J_{F,C} = 28$  Hz,  $CF_3$ ), 36.6 (d,  $^1J_{P,C} = 59$  Hz,  $C(CH_3)_3$ ), 26.9 (s,  $C(CH_3)_3$ ), 16.3 (d,  $^1J_{P,C} = 47$  Hz,  $CH_2$ ).

$^{19}F$  NMR (565 MHz,  $CD_2Cl_2$ ):  $\delta$  [ppm] =  $-82.3$  (m,  $CF_3$ ),  $-109.4/-110.6$  (m, AB-spin system,  $CF_2$ , broad).

$^{31}P\{^1H\}$  NMR (243 MHz,  $CD_2Cl_2$ ):  $\delta$  [ppm] = 63.7 (s).

Elemental analysis calcd (%) for  $C_{13}H_{20}F_{10}OPSb$  ( $M_r = 535.02$ ): C 29.18, H 3.77; found: C 29.69, H 3.68.

MS (EI, 70 eV):  $m/z = 415.1$  [ $M - C_2F_5$ ] $^+$ , 359.0 [ $M - C_2F_5 - C_4H_8$ ] $^+$ , 296.1 [ $M - 2C_2F_5$ ] $^+$ , 239.9 [ $MH - 2C_2F_5 - C_4H_9$ ] $^+$ , 183.9 [ $M - 2C_2F_5 - C_4H_7$ ] $^+$ , 119.2 [ $C_2F_5$ ] $^+$ , 57.1 [ $C_4H_9$ ] $^+$ .

**(F<sub>5</sub>C<sub>2</sub>)<sub>2</sub>SbCH<sub>2</sub>P(S)(tBu)<sub>2</sub> (3):**

A solution of **1** (0.49 g, 0.95 mmol) in toluene (10 mL) was added to elemental sulphur (60 mg, 1.9 mmol) and was stirred for 20 h at room temperature. To remove residual sulphur, the suspension was filtered and the filtrate was concentrated and kept at 0 °C overnight. The supernatant liquid was removed and dried under vacuum. **3** (0.41 g, 0.75 mmol, 79 %) was received as beige crystalline solid, whose crystals were suitable for X-ray diffraction.

*Analytical data:*

<sup>1</sup>H NMR (600 MHz, CD<sub>2</sub>Cl<sub>2</sub>): δ [ppm] = 2.79 (d, <sup>2</sup>J<sub>P,H</sub> = 8 Hz, 2H, CH<sub>2</sub>), 1.38 (d, <sup>3</sup>J<sub>P,H</sub> = 16 Hz, 18H, C(CH<sub>3</sub>)<sub>3</sub>).

<sup>13</sup>C{<sup>1</sup>H} NMR (151 MHz, CD<sub>2</sub>Cl<sub>2</sub>): δ [ppm] = 123.7 (m, CF<sub>2</sub>), 120.7 (qt, <sup>1</sup>J<sub>F,C</sub> = 284 Hz, <sup>2</sup>J<sub>F,C</sub> = 28 Hz, CF<sub>3</sub>), 39.0 (d, <sup>1</sup>J<sub>P,C</sub> = 39 Hz, C(CH<sub>3</sub>)<sub>3</sub>), 27.4 (m, C(CH<sub>3</sub>)<sub>3</sub>), 17.9 (d, <sup>1</sup>J<sub>P,C</sub> = 37 Hz, CH<sub>2</sub>).

<sup>19</sup>F NMR (565 MHz, CD<sub>2</sub>Cl<sub>2</sub>): δ [ppm] = -82.3 (s, CF<sub>3</sub>), -108.2/-110.5 (m, AB-spin system CF<sub>2</sub>, broad).

<sup>31</sup>P{<sup>1</sup>H} NMR (243 MHz, CD<sub>2</sub>Cl<sub>2</sub>): δ [ppm] = 76.6 (s).

Elemental analysis calcd (%) for C<sub>13</sub>H<sub>20</sub>F<sub>10</sub>PSSb (*M<sub>r</sub>* = 551.08): C 28.33, H 3.66, S 5.82; found: C 28.05, H 3.61, S 6.15.

MS (EI, 70 EV): *m/z* = 431.1 [M - C<sub>2</sub>F<sub>5</sub>]<sup>+</sup>, 375.0 [M - C<sub>2</sub>F<sub>5</sub> - C<sub>4</sub>H<sub>8</sub>]<sup>+</sup>, 312.1 [M - 2C<sub>2</sub>F<sub>5</sub>]<sup>+</sup>, 255.9 [MH - 2C<sub>2</sub>F<sub>5</sub> - C<sub>4</sub>H<sub>9</sub>]<sup>+</sup>, 199.9 [M - 2C<sub>2</sub>F<sub>5</sub> - C<sub>4</sub>H<sub>7</sub>]<sup>+</sup>, 57.1 [C<sub>4</sub>H<sub>9</sub>]<sup>+</sup>.

**(F<sub>5</sub>C<sub>2</sub>)<sub>2</sub>SbCH<sub>2</sub>P(Se)(tBu)<sub>2</sub> (4):**

A solution of **1** (0.50 g, 0.96 mmol) in toluene (10 mL) was added to elemental selenium (0.26 g, 3.3 mmol) and was stirred for 20 h at room temperature. The suspension was filtered to remove residual selenium. The solvent was removed from the filtrate under reduced pressure and the residue was dried under vacuum. **4** (0.38 g, 0.64 mmol, 66 %) was obtained as colourless solid. Single crystals suitable for X-ray diffraction were obtained from a saturated solution of **4** in cyclopentane at -20 °C.

*Analytical data:*

<sup>1</sup>H NMR (600 MHz, CD<sub>2</sub>Cl<sub>2</sub>): δ [ppm] = 2.93 (d, <sup>2</sup>J<sub>P,H</sub> = 9 Hz, 2H, CH<sub>2</sub>), 1.40 (d, <sup>3</sup>J<sub>P,H</sub> = 16 Hz, 18H, C(CH<sub>3</sub>)<sub>3</sub>).

<sup>13</sup>C{<sup>1</sup>H} NMR (151 MHz, CD<sub>2</sub>Cl<sub>2</sub>): δ [ppm] = 124.2 (m, CF<sub>2</sub>), 120.7 (qt, <sup>1</sup>J<sub>F,C</sub> = 285 Hz, <sup>2</sup>J<sub>F,C</sub> = 28 Hz, CF<sub>3</sub>), 38.7 (d, <sup>1</sup>J<sub>P,C</sub> = 31 Hz, C(CH<sub>3</sub>)<sub>3</sub>), 27.7 (m, C(CH<sub>3</sub>)<sub>3</sub>), 17.5 (d, <sup>1</sup>J<sub>P,C</sub> = 31 Hz, CH<sub>2</sub>).

<sup>19</sup>F NMR (565 MHz, CD<sub>2</sub>Cl<sub>2</sub>): δ [ppm] = -82.2 (s, CF<sub>3</sub>), -107.8/-110.5 (m, AB-spin system CF<sub>2</sub>, broad).

<sup>31</sup>P{<sup>1</sup>H} NMR (243 MHz, CD<sub>2</sub>Cl<sub>2</sub>): δ [ppm] = 73.0 (s).

Elemental analysis calcd (%) for C<sub>13</sub>H<sub>20</sub>F<sub>10</sub>PSbSe (*M<sub>r</sub>* = 597.99): C 26.11, H 3.37; found: C 26.44, H 3.38.

MS (EI, 70 EV): *m/z* = 479.0 [M - C<sub>2</sub>F<sub>5</sub>]<sup>+</sup>, 422.9 [M - C<sub>2</sub>F<sub>5</sub> - C<sub>4</sub>H<sub>8</sub>]<sup>+</sup>, 360.0 [M - 2C<sub>2</sub>F<sub>5</sub>]<sup>+</sup>, 303.9 [MH - 2C<sub>2</sub>F<sub>5</sub> - C<sub>4</sub>H<sub>9</sub>]<sup>+</sup>, 57.1 [C<sub>4</sub>H<sub>9</sub>]<sup>+</sup>.

**(F<sub>5</sub>C<sub>2</sub>)<sub>2</sub>SbCH<sub>2</sub>P(Te)(tBu)<sub>2</sub> (5):**

A solution of **1** (0.52 g, 0.99 mmol) in toluene (10 mL) was added to elemental tellurium (0.16 g, 1.3 mmol) and was stirred for 20 h at room temperature. The greenish suspension was filtered to remove residual tellurium. The solvent was removed from the filtrate under reduced pressure and the residue was dried under vacuum. **5** (0.51 g, 0.78 mmol, 79 %) was obtained as yellow crystalline solid. Single crystals suitable for X-ray diffraction were obtained from a saturated solution of **4** in cyclopentane at -20 °C.

*Analytical data:*

<sup>1</sup>H NMR (600 MHz, CD<sub>2</sub>Cl<sub>2</sub>): δ [ppm] = 3.18 (d, <sup>2</sup>J<sub>P,H</sub> = 10 Hz, 2H, CH<sub>2</sub>), 1.42 (d, <sup>3</sup>J<sub>P,H</sub> = 16 Hz, 18H, C(CH<sub>3</sub>)<sub>3</sub>).

<sup>13</sup>C{<sup>1</sup>H} NMR (151 MHz, CD<sub>2</sub>Cl<sub>2</sub>): δ [ppm] = 124.0 (m, CF<sub>2</sub>), 120.8 (qt, <sup>1</sup>J<sub>F,C</sub> = 285 Hz, <sup>2</sup>J<sub>F,C</sub> = 29 Hz, CF<sub>3</sub>), 38.1 (d, <sup>1</sup>J<sub>P,C</sub> = 22 Hz, C(CH<sub>3</sub>)<sub>3</sub>), 28.1 (m, C(CH<sub>3</sub>)<sub>3</sub>), 17.7 (d, <sup>1</sup>J<sub>P,C</sub> = 25 Hz, CH<sub>2</sub>).

<sup>19</sup>F NMR (565 MHz, CD<sub>2</sub>Cl<sub>2</sub>): δ [ppm] = -82.2 (s, CF<sub>3</sub>), -106.5/-110.4 (m, AB-spin system CF<sub>2</sub>, broad).

<sup>31</sup>P{<sup>1</sup>H} NMR (243 MHz, CD<sub>2</sub>Cl<sub>2</sub>): δ [ppm] = 45.4 (s).

Elemental analysis calcd (%) for C<sub>13</sub>H<sub>20</sub>F<sub>10</sub>PSbTe (M<sub>r</sub> = 646.62): C 24.15, H 3.12; found: C 24.46, H 3.11.

MS (EI, 70 EV): m/z = 529.0 [M - C<sub>2</sub>F<sub>5</sub>]<sup>+</sup>, 472.9 [M - C<sub>2</sub>F<sub>5</sub> - C<sub>4</sub>H<sub>8</sub>]<sup>+</sup>, 57.1 [C<sub>4</sub>H<sub>9</sub>]<sup>+</sup>.

**(F<sub>5</sub>C<sub>2</sub>)<sub>2</sub>Sb(CH<sub>2</sub>)(μ-O)P(tBu)<sub>2</sub>Cat<sup>Cl</sup> (6):**

A red solution of *o*-chloranil (2.8 mg, 11 μmol) in *n*-hexane (3 mL) was added to a solution of **2** (5 mg, 9 μmol) in *n*-hexane (0.5 mL), whereby the added solution immediately decoloured. The mixture was stirred overnight at room temperature. The resulting solid was separated from the supernatant liquid, washed with *n*-hexane (1 mL) and dried under vacuum. **6** (6 mg, 8 μmol, 89 %) was obtained as colourless solid. Single crystals suitable for X-ray diffraction were obtained from a solution of **6** in C<sub>6</sub>D<sub>6</sub>.

*Analytical data:*

<sup>1</sup>H NMR (600 MHz, CD<sub>2</sub>Cl<sub>2</sub>): δ [ppm] = 4.38 (d, <sup>2</sup>J<sub>P,H</sub> = 5 Hz, 2H, CH<sub>2</sub>), 1.47 (d, <sup>3</sup>J<sub>P,H</sub> = 16 Hz, 18H, C(CH<sub>3</sub>)<sub>3</sub>).

<sup>13</sup>C{<sup>1</sup>H} NMR (151 MHz, CD<sub>2</sub>Cl<sub>2</sub>): δ [ppm] = 144.3 (s, Cat<sup>Cl</sup>), 124.8 (m, CF<sub>2</sub>), 122.3 (s, Cat<sup>Cl</sup>), 120.1 (qt, <sup>1</sup>J<sub>F,C</sub> = 286 Hz, <sup>2</sup>J<sub>F,C</sub> = 28 Hz, CF<sub>3</sub>), 117.7 (s, Cat<sup>Cl</sup>), 51.2 (s, CH<sub>2</sub>), 37.7 (d, <sup>1</sup>J<sub>P,C</sub> = 48 Hz, C(CH<sub>3</sub>)<sub>3</sub>), 27.7 (s, C(CH<sub>3</sub>)<sub>3</sub>).

<sup>13</sup>C{<sup>19</sup>F} NMR (151 MHz, CD<sub>2</sub>Cl<sub>2</sub>): δ [ppm] = 144.3 (s, Cat<sup>Cl</sup>), 124.9 (s, CF<sub>2</sub>), 122.3 (s, Cat<sup>Cl</sup>), 120.1 (s, CF<sub>3</sub>), 117.7 (s, Cat<sup>Cl</sup>), 51.2 (m, CH<sub>2</sub>, broad), 37.7 (m, C(CH<sub>3</sub>)<sub>3</sub>), 27.6 (m, C(CH<sub>3</sub>)<sub>3</sub>).

<sup>19</sup>F NMR (565 MHz, CD<sub>2</sub>Cl<sub>2</sub>): δ [ppm] = -79.5 (s, CF<sub>3</sub>), -108.8/-110.7 (m, AB-spin system, CF<sub>2</sub>, broad).

<sup>31</sup>P{<sup>1</sup>H} NMR (243 MHz, CD<sub>2</sub>Cl<sub>2</sub>): δ [ppm] = 88.4 (s).

Elemental analysis calcd (%) for C<sub>19</sub>H<sub>20</sub>Cl<sub>4</sub>F<sub>10</sub>O<sub>3</sub>PSb (M<sub>r</sub> = 780.88): C 29.22, H 2.58; found: C 29.21, H 2.52.

**(F<sub>3</sub>C<sub>2</sub>)<sub>2</sub>Sb(CH<sub>2</sub>)(μ-S)P(tBu)<sub>2</sub>·Cat<sup>Cl</sup> (**7**):**

A red solution of *o*-chloranil (12 mg, 47 μmol) in *n*-hexane (3 mL) was added to a solution of **3** (23 mg, 42 μmol) in *n*-hexane (0.5 mL) under immediate decolourisation leaving finally a yellowish mixture. The mixture was stirred overnight at room temperature. The resulting solid was separated from the supernatant liquid, washed with *n*-hexane (1 mL) and dried under vacuum. A mixture of **7** and **3** was obtained. After recrystallisation in *n*-hexane, yellow crystals of **7** (29 mg) were obtained, whose were suitable for X-ray diffraction. NMR data and elemental analysis indicate the presence of some minor undefined impurities, which were not removable.

*Analytical data:*

<sup>1</sup>H NMR (600 MHz, CD<sub>2</sub>Cl<sub>2</sub>): δ [ppm] = 4.68 (s, 2H, CH<sub>2</sub>, broad), 1.56 (d, <sup>3</sup>J<sub>P,H</sub> = 18 Hz, 18H, C(CH<sub>3</sub>)<sub>3</sub>).

<sup>13</sup>C{<sup>1</sup>H} NMR (151 MHz, CD<sub>2</sub>Cl<sub>2</sub>): δ [ppm] = 144.3 (s, Cat<sup>Cl</sup>, broad), 122.2 (s, Cat<sup>Cl</sup>, broad), 120.2 (qt, <sup>1</sup>J<sub>F,C</sub> = 286 Hz, <sup>2</sup>J<sub>F,C</sub> = 28 Hz, CF<sub>3</sub>), 118.1 (s, Cat<sup>Cl</sup>, broad), 55.8 (d, <sup>1</sup>J<sub>P,C</sub> = 30 Hz, CH<sub>2</sub>), 40.4 (d, <sup>1</sup>J<sub>P,C</sub> = 29 Hz, C(CH<sub>3</sub>)<sub>3</sub>), 28.5 (s, C(CH<sub>3</sub>)<sub>3</sub>), CF<sub>2</sub> signal not observable, due to low intensity and strong broadening.

<sup>13</sup>C{<sup>19</sup>F} NMR (151 MHz, CD<sub>2</sub>Cl<sub>2</sub>): δ [ppm] = 144.2 (s, Cat<sup>Cl</sup>, broad), 123.7 (s, CF<sub>2</sub>, broad), 122.1 (s, Cat<sup>Cl</sup>, broad), 120.2 (s, CF<sub>3</sub>, broad), 118.1 (s, Cat<sup>Cl</sup>, broad), 55.8 (m, CH<sub>2</sub>), 40.4 (m, C(CH<sub>3</sub>)<sub>3</sub>), 28.5 (m, C(CH<sub>3</sub>)<sub>3</sub>).

<sup>19</sup>F NMR (565 MHz, CD<sub>2</sub>Cl<sub>2</sub>): δ [ppm] = -77.9 (s, CF<sub>3</sub>), -81.2 (s, CF<sub>3</sub>), -104.7/-106.9 (d, <sup>2</sup>J<sub>F,F</sub> = 294 Hz, AB-spin system, CF<sub>2</sub>, broad), -113.5/-116.6 (d, <sup>2</sup>J<sub>F,F</sub> = 304 Hz, AB-spin system, CF<sub>2</sub>, broad).

<sup>31</sup>P{<sup>1</sup>H} NMR (243 MHz, CD<sub>2</sub>Cl<sub>2</sub>): δ [ppm] = 78.9 (s).

Elemental analysis calcd (%) for C<sub>19</sub>H<sub>20</sub>Cl<sub>4</sub>F<sub>10</sub>O<sub>2</sub>PSSb (M<sub>r</sub> = 796.94): C 28.64, H 2.53, S 4.02; found: C 30.40, H 2.33, S 3.82.

**(F<sub>3</sub>C<sub>2</sub>)<sub>2</sub>Sb(CH<sub>2</sub>)(μ-Se)P(tBu)<sub>2</sub>·Cat<sup>Cl</sup> (**8**):**

A red solution of *o*-chloranil (13 mg, 51 μmol) in *n*-hexane (3 mL) was added to a solution of **4** (26 mg, 43 μmol) in *n*-hexane (0.5 mL), under immediate decolourisation leaving finally an orange mixture. The mixture was stirred overnight at room temperature. The resulting solid was separated from the supernatant liquid, washed with *n*-hexane (1 mL) and dried under vacuum. A mixture of **8** and **4** was obtained. After recrystallisation in *n*-hexane, orange crystals of **8** (29 mg, 34 μmol, 79 %) were obtained, whose were suitable for X-ray diffraction.

*Analytical data:*

<sup>1</sup>H NMR (600 MHz, CD<sub>2</sub>Cl<sub>2</sub>): δ [ppm] = 4.92 (m, 2H, CH<sub>2</sub>), 1.58 (m, 18H, C(CH<sub>3</sub>)<sub>3</sub>).

<sup>13</sup>C{<sup>1</sup>H} NMR (151 MHz, CD<sub>2</sub>Cl<sub>2</sub>): δ [ppm] = 144.5 (s, Cat<sup>Cl</sup>), 144.0 (s, Cat<sup>Cl</sup>), 122.4 (s, Cat<sup>Cl</sup>), 121.8 (s, Cat<sup>Cl</sup>), 118.4 (s, Cat<sup>Cl</sup>), 118.1 (s, Cat<sup>Cl</sup>), 56.8 (d, <sup>1</sup>J<sub>P,C</sub> = 26 Hz, CH<sub>2</sub>), 40.6 (d, <sup>1</sup>J<sub>P,C</sub> = 23 Hz, C(CH<sub>3</sub>)<sub>3</sub>), 28.9 (s, C(CH<sub>3</sub>)<sub>3</sub><sup>A</sup>), 28.5 (s, C(CH<sub>3</sub>)<sub>3</sub><sup>B</sup>), CF<sub>2</sub> and CF<sub>3</sub> signals not observable, due to low intensity and strong broadening. – <sup>13</sup>C{<sup>19</sup>F} NMR (151 MHz, CD<sub>2</sub>Cl<sub>2</sub>): δ [ppm] = 144.2 (s, Cat<sup>Cl</sup>, broad), 125.4 (s, CF<sub>2</sub>, broad), 122.1 (s, Cat<sup>Cl</sup>, broad), 120.2 (s, CF<sub>3</sub>, broad), 118.1 (s, Cat<sup>Cl</sup>, broad), 55.8 (m, CH<sub>2</sub>), 40.4 (m, C(CH<sub>3</sub>)<sub>3</sub>), 29.2 (m, C(CH<sub>3</sub>)<sub>3</sub><sup>A</sup>), 28.3 (m, C(CH<sub>3</sub>)<sub>3</sub><sup>B</sup>).

<sup>19</sup>F NMR (565 MHz, CD<sub>2</sub>Cl<sub>2</sub>): δ [ppm] = -77.8 (m, CF<sub>3</sub><sup>A</sup>), -81.3 (m, CF<sub>3</sub><sup>B</sup>), -105.2/-107.9 (m, AB-spin system, CF<sub>2</sub><sup>A</sup>, broad), -113.5/-116.6 (m, AB-spin system, CF<sub>2</sub><sup>B</sup>, broad).

<sup>31</sup>P{<sup>1</sup>H} NMR (243 MHz, CD<sub>2</sub>Cl<sub>2</sub>): δ [ppm] = 73.2 (s).

Elemental analysis calcd (%) for  $C_{19}H_{20}Cl_4F_{10}O_2PSbSe$  ( $M_r = 843.86$ ): C 27.04, H 2.39; found: C 27.41, H 2.38.

**$(F_3C_2)_2Sb(CH_2)(Cat^{Cl})P(tBu)_2 \cdot Cat^{Cl}$  (**9**):**

A red solution of *o*-chloranil (0.55 g, 2.2 mmol) in dichloromethane (10 mL) was added to a solution of **1** (0.53 g, 1.0 mmol) in dichloromethane (20 mL) at room temperature under immediate decolourisation. The yellow solution was concentrated under reduced pressure. Colourless crystals were grown at  $-20$  °C. After isolation and drying under vacuum, **9** (0.80 g, 0.79 mmol, 79 %) was obtained in the form of orange crystals. Single crystals suitable for X-ray diffraction were obtained from a solution of **9** in  $C_6D_6$ .

A red solution of *o*-chloranil (13 mg, 53  $\mu$ mol) in dichloromethane (4 mL) was added to a solution of **10** (32 mg, 42  $\mu$ mol) in dichloromethane (6 mL) at room temperature under immediate decolourisation. The yellow solution was concentrated under reduced pressure. Colourless crystals grew at  $-20$  °C. After isolation and drying them under vacuum, **9** was obtained in the form of orange crystals.

A red solution of *o*-chloranil (10 mg, 39  $\mu$ mol) in *n*-hexane (3 mL) was added to a solution of **5** (21 mg, 33  $\mu$ mol) in *n*-hexane (0.5 mL) under immediate decolourisation leaving finally a yellowish mixture. The mixture was stirred overnight at room temperature, whereby a black solid precipitated. The solid was collected on a filter and the filtrate was dried under vacuum. **9** (23 mg, 23  $\mu$ mol, 70 %) was obtained as a yellow solid.

*Analytical data:*

$^1H$  NMR (600 MHz,  $CD_2Cl_2$ ):  $\delta$  [ppm] = 3.09 (dd,  $^2J_{H,H} = 14$  Hz,  $^2J_{P,H} = 6$  Hz, 1H,  $CH_2^A$ ), 2.89 (dd,  $^2J_{H,H} = 14$  Hz,  $^2J_{P,H} = 5$  Hz, 1H,  $CH_2^B$ ), 1.77 (d,  $^3J_{P,H} = 17$  Hz, 9H,  $C(CH_3)_3^A$ ), 1.43 (d,  $^3J_{P,H} = 17$  Hz, 9H,  $C(CH_3)_3^B$ ).

$^{13}C\{^1H\}$  NMR (151 MHz,  $CD_2Cl_2$ ):  $\delta$  [ppm] = 145.9 (s,  $Cat^{Cl}$ ), 145.2 (s,  $Cat^{Cl}$ ), 144.8 (s,  $Cat^{Cl}$ ), 141.9 (m,  $Cat^{Cl}$ ), 129.7 (s,  $Cat^{Cl}$ ), 127.0 (s,  $Cat^{Cl}$ ), 124.5 (s,  $Cat^{Cl}$ ), 123.6 (m,  $Cat^{Cl}$ ), 122.2 (s,  $Cat^{Cl}$ ), 121.5 (s,  $Cat^{Cl}$ ), 120.0 (m,  $CF_3$ ), 118.7 (s,  $Cat^{Cl}$ ), 116.0 (s,  $Cat^{Cl}$ ), 40.9 (d,  $^1J_{P,C} = 56$  Hz,  $C(CH_3)_3^A$ ), 40.1 (d,  $^1J_{P,C} = 40$  Hz,  $C(CH_3)_3^B$ ), 27.2 (s,  $C(CH_3)_3^A$ ), 26.8 (s,  $C(CH_3)_3^B$ ), 19.5 (d,  $^1J_{P,C} = 44$  Hz,  $CH_2$ ),  $CF_2$  signal not observable, due to low intensity and strong broadening.

$^{19}F$  NMR (565 MHz,  $CD_2Cl_2$ ):  $\delta$  [ppm] =  $-80.2$  (m,  $CF_3^A$ ),  $-82.1$  (m,  $CF_3^B$ ),  $-110.9/-113.6$  (m, AB-spin system,  $CF_2^A$ , broad),  $-114.7/-117.3$  (m, AB-spin system,  $CF_2^B$ , broad).

$^{31}P\{^1H\}$  NMR (243 MHz,  $CD_2Cl_2$ ):  $\delta$  [ppm] = 110.0 (s).

Elemental analysis calcd (%) for  $C_{25}H_{20}Cl_8F_{10}O_4PSb$  ( $M_r = 1010.75$ ): C 29.71, H 1.99; found: C 30.05, H 1.81.

**$(F_3C_2)_2Sb(CH_2)(Cat^{Cl})P(tBu)_2$  (**10**):**

At  $-60$  °C a red solution of *o*-chloranil (0.23 mg, 0.94 mmol) in dichloromethane (10 mL) was added to a solution of **1** (0.52 mg, 1.0 mmol) in dichloromethane (20 mL) over 30 min, the added drops decolourising immediately. The yellowish solution was concentrated under reduced pressure at room temperature. Colourless crystals grew at  $-20$  °C. After isolation and drying under vacuum, **10** (0.61 g, 0.80 mmol, 85 %) was obtained as colourless crystals. Single crystals suitable for X-ray diffraction were obtained from a solution of **10** in  $C_6D_6$ .

*Analytical data:*

$^1H$  NMR (600 MHz,  $CD_2Cl_2$ ):  $\delta$  [ppm] = 2.90 (m, 2H,  $CH_2$ ), 1.51 (d,  $^3J_{P,H} = 16$  Hz, 18H,  $C(CH_3)_3$ ).

**<sup>13</sup>C{<sup>1</sup>H} NMR** (151 MHz, CD<sub>2</sub>Cl<sub>2</sub>): δ [ppm] = 152.1 (s, Cat<sup>Cl</sup>), 142.1 (m, Cat<sup>Cl</sup>), 130.0 (s, Cat<sup>Cl</sup>), 126.0 (s, Cat<sup>Cl</sup>), 122.2 (m, Cat<sup>Cl</sup>), 121.0 (m, CF<sub>3</sub>), 116.9 (s, Cat<sup>Cl</sup>), 39.6 (d, <sup>1</sup>J<sub>P,C</sub> = 48 Hz, C(CH<sub>3</sub>)<sub>3</sub>), 27.2 (s, C(CH<sub>3</sub>)<sub>3</sub>), 10.8 (d, <sup>1</sup>J<sub>P,C</sub> = 50 Hz, CH<sub>2</sub>), CF<sub>2</sub> signal not observable, due to low intensity and strong broadening.

**<sup>19</sup>F NMR** (565 MHz, CD<sub>2</sub>Cl<sub>2</sub>): δ [ppm] = -81.3 (m, CF<sub>3</sub>), -112.5 (m, CF<sub>2</sub>, broad).

**<sup>31</sup>P{<sup>1</sup>H} NMR** (243 MHz, CD<sub>2</sub>Cl<sub>2</sub>): δ [ppm] = 111.4 (s).

Elemental analysis calcd (%) for C<sub>19</sub>H<sub>20</sub>Cl<sub>4</sub>F<sub>10</sub>O<sub>2</sub>PSb (*M<sub>r</sub>* = 764.88): C 29.84, H 2.64; found: C 30.01, H 2.57.



## NMR spectroscopic data

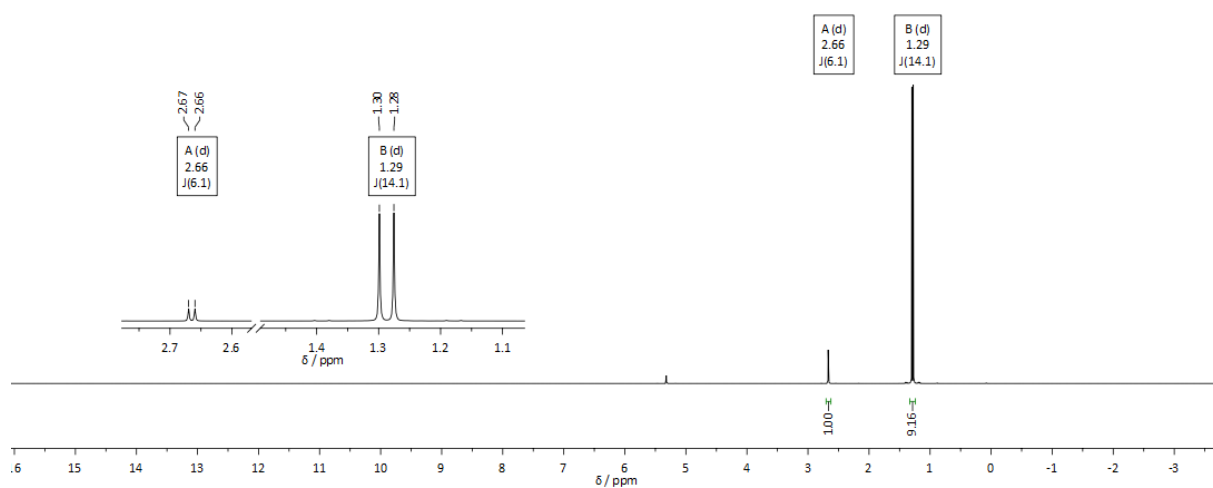

**Figure S1**  $^1\text{H}$  NMR spectrum of **2** in  $\text{CD}_2\text{Cl}_2$ .

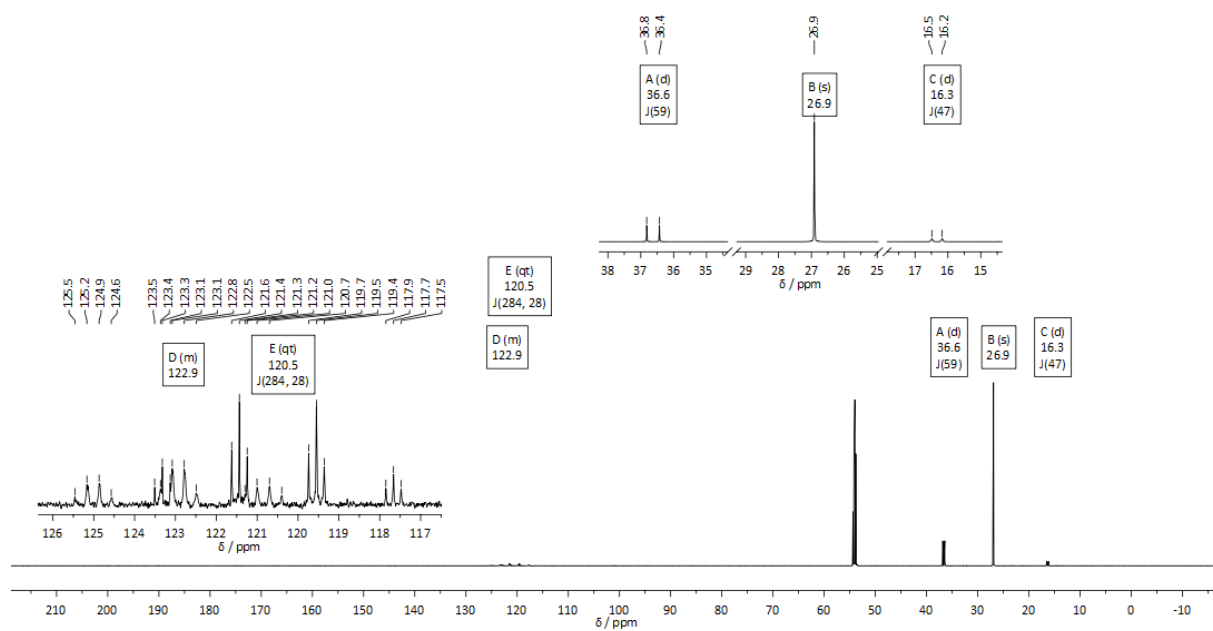

**Figure S2**  $^{13}\text{C}\{^1\text{H}\}$  NMR spectrum of **2** in  $\text{CD}_2\text{Cl}_2$ .

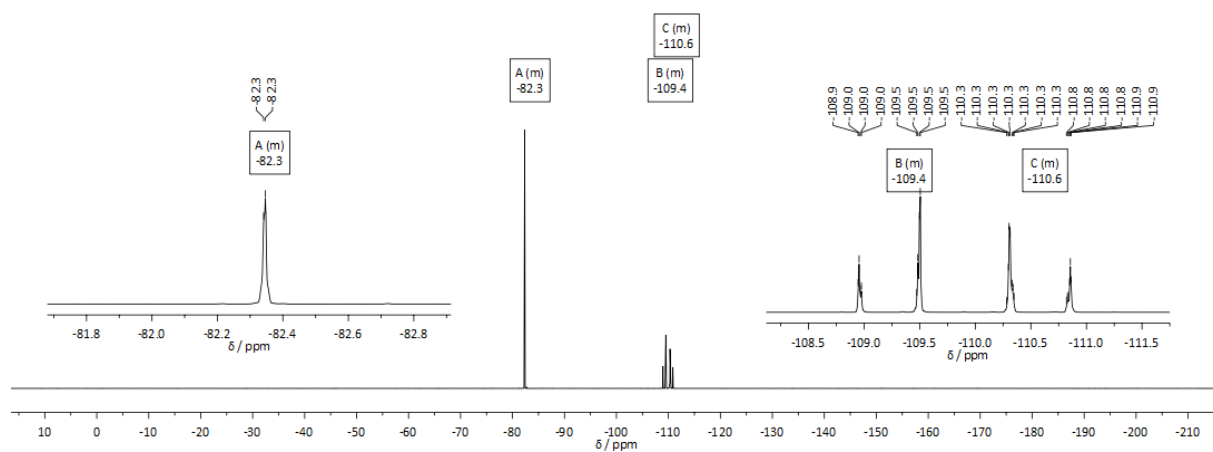

**Figure S3**  $^{19}\text{F}$  NMR spectrum of **2** in  $\text{CD}_2\text{Cl}_2$ .

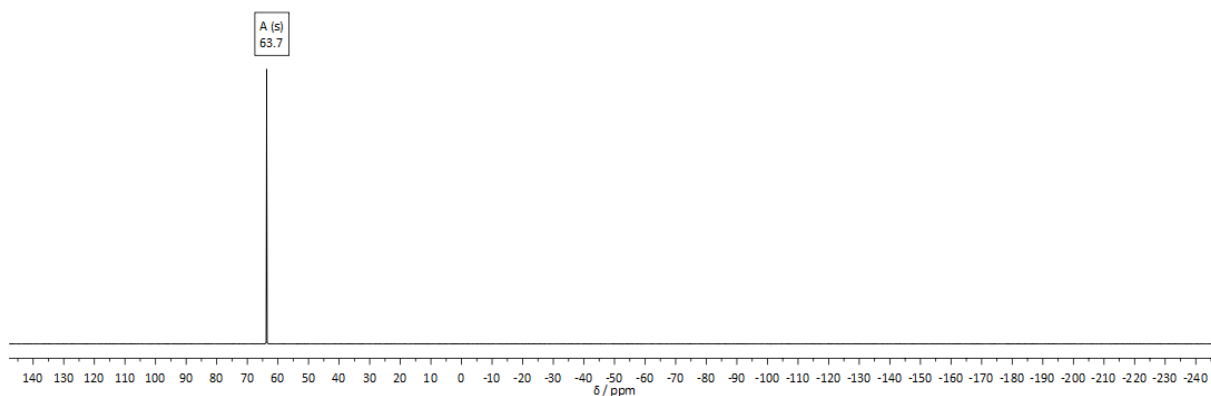

Figure S4  $^{31}\text{P}\{^1\text{H}\}$  NMR spectrum of **2** in  $\text{CD}_2\text{Cl}_2$ .

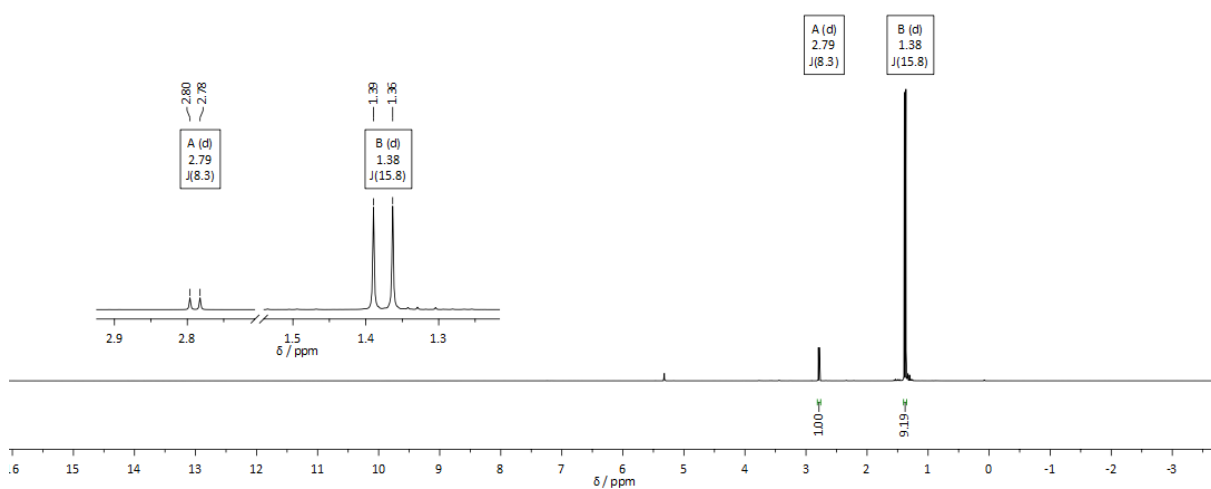

Figure S5  $^1\text{H}$  NMR spectrum of **3** in  $\text{CD}_2\text{Cl}_2$ .

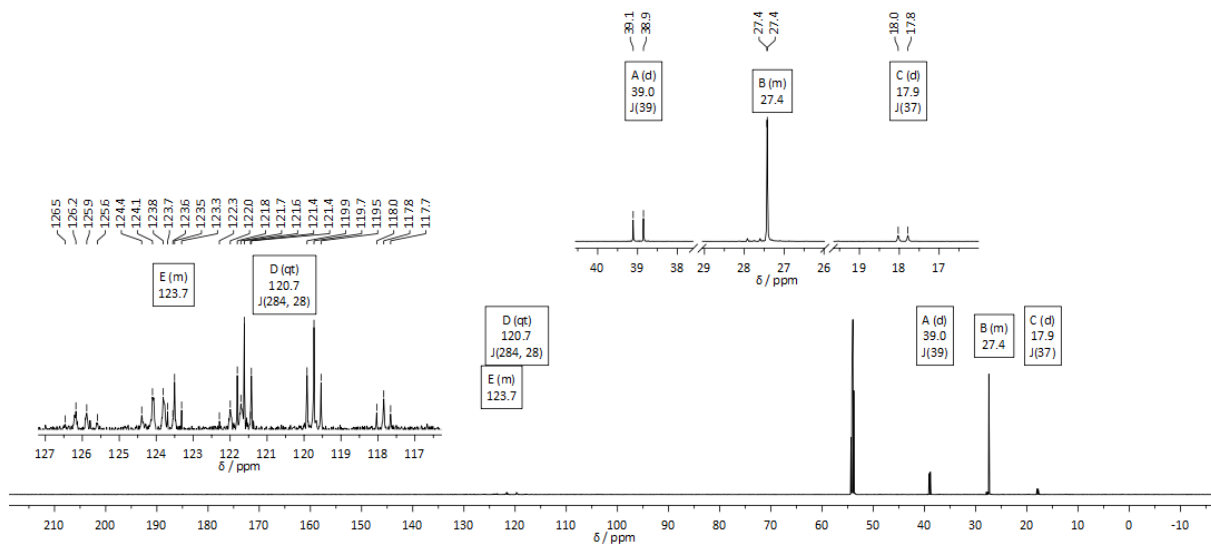

Figure S6  $^{13}\text{C}\{^1\text{H}\}$  NMR spectrum of **3** in  $\text{CD}_2\text{Cl}_2$ .

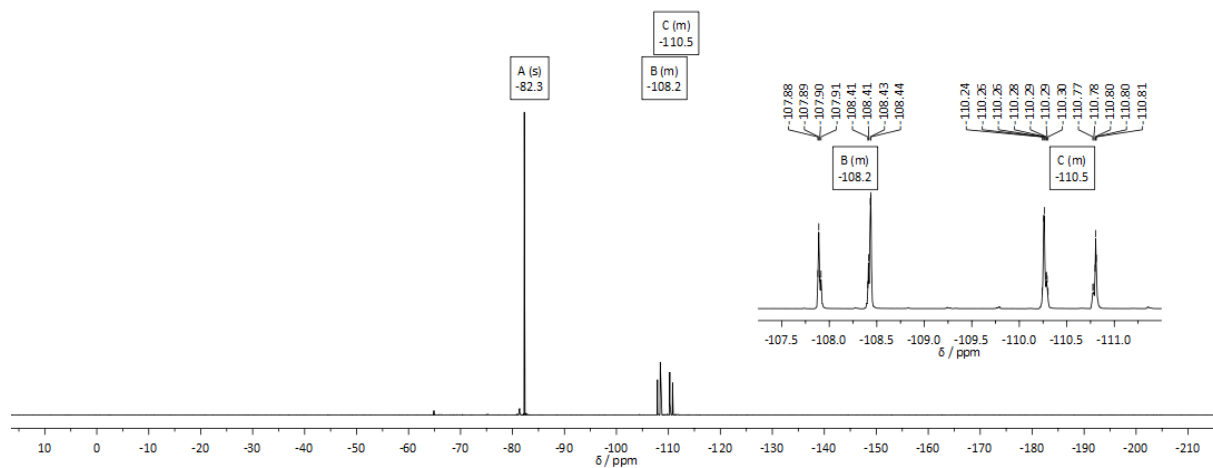

Figure S7  $^{19}\text{F}$  NMR spectrum of **3** in  $\text{CD}_2\text{Cl}_2$ .

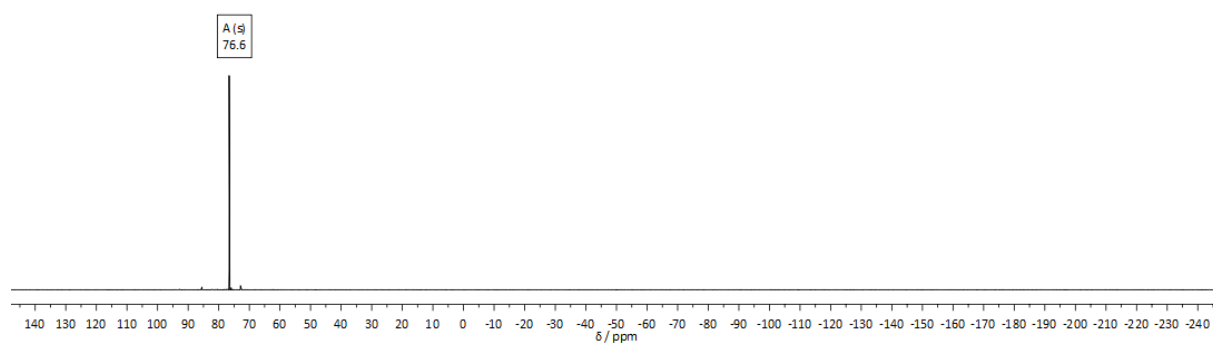

Figure S8  $^{31}\text{P}\{^1\text{H}\}$  NMR spectrum of **3** in  $\text{CD}_2\text{Cl}_2$ .

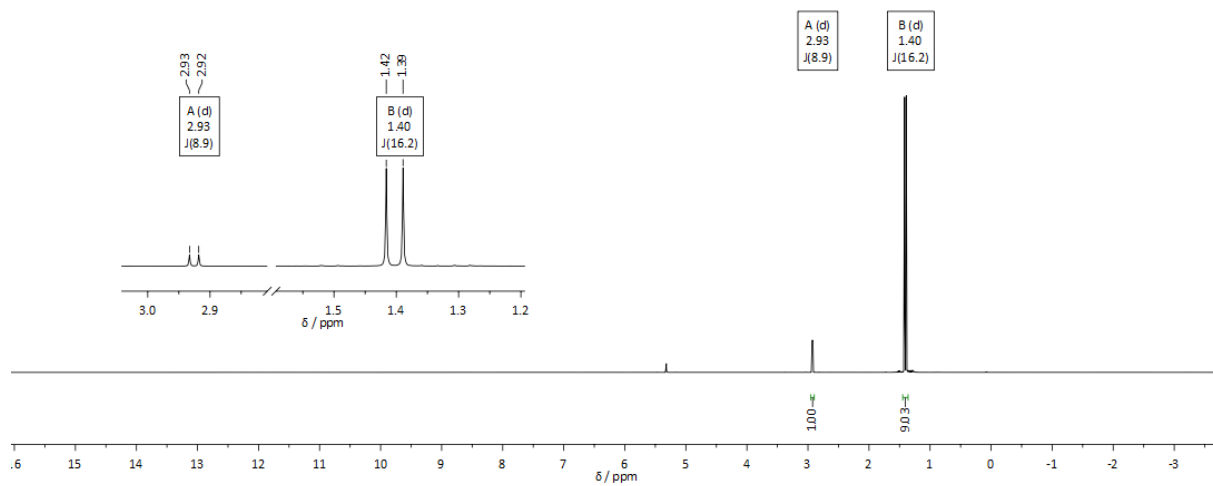

Figure S9  $^1\text{H}$  NMR spectrum of **4** in  $\text{CD}_2\text{Cl}_2$ .

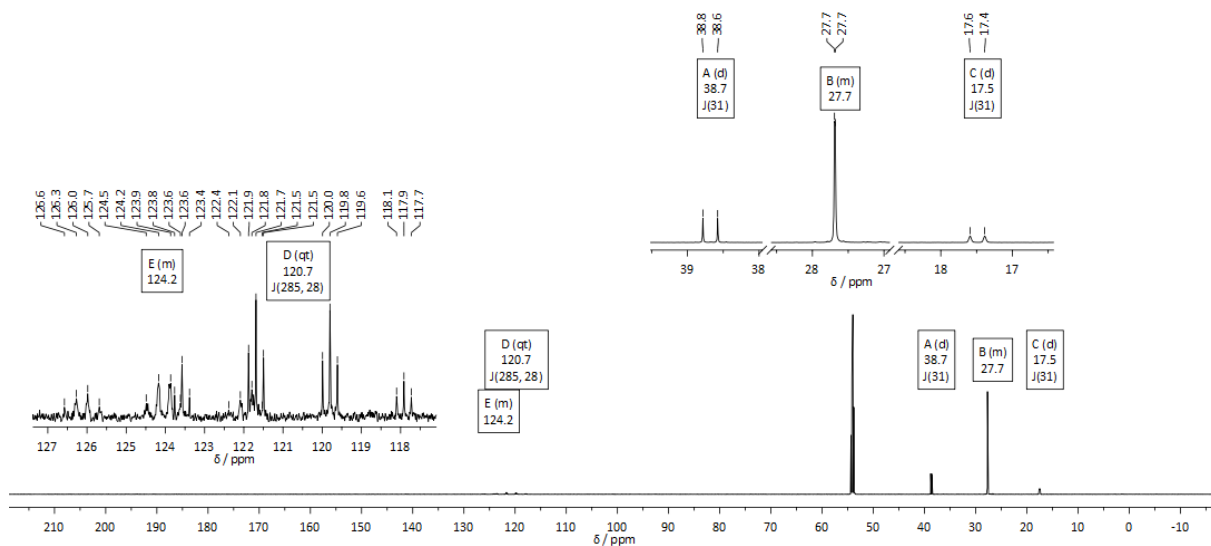

Figure S10  $^{13}\text{C}\{^1\text{H}\}$  NMR spectrum of **4** in  $\text{CD}_2\text{Cl}_2$ .

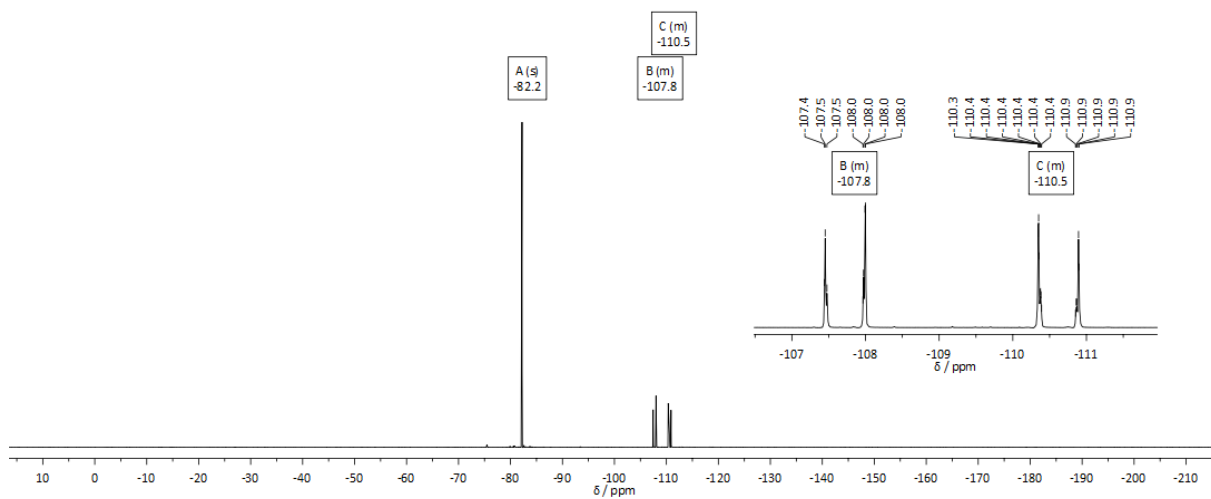

Figure S11  $^{19}\text{F}$  NMR spectrum of **4** in  $\text{CD}_2\text{Cl}_2$ .

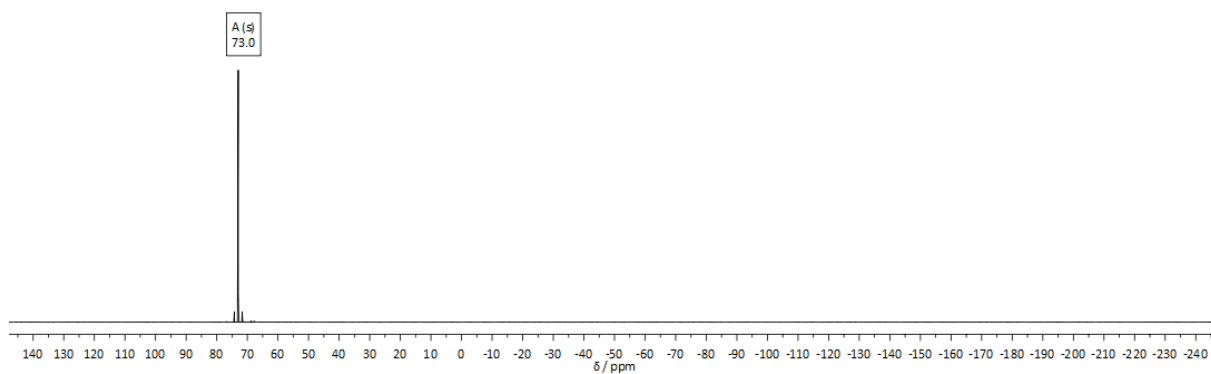

Figure S12  $^{31}\text{P}\{^1\text{H}\}$  NMR spectrum of **4** in  $\text{CD}_2\text{Cl}_2$ .

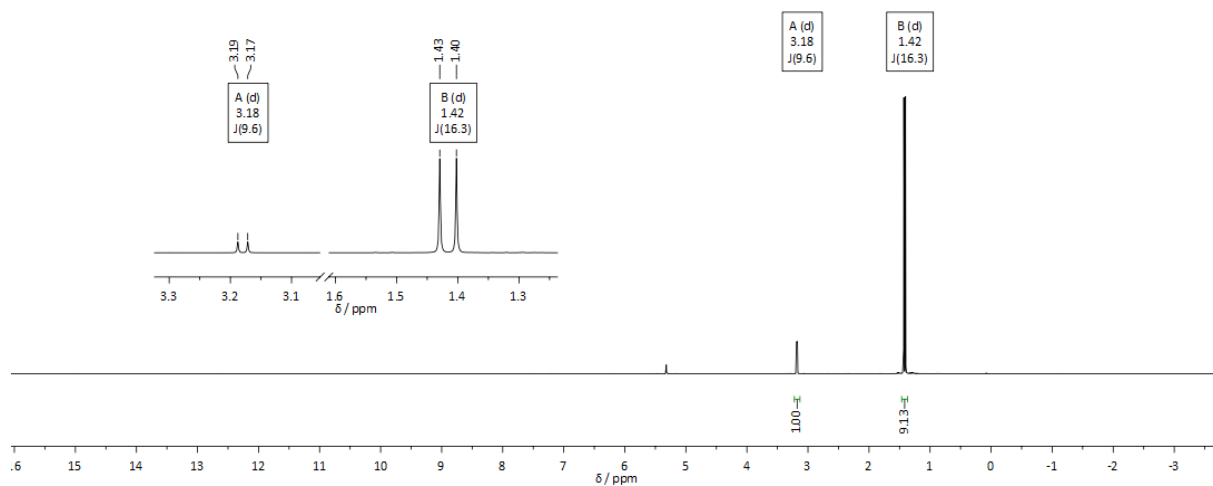

Figure S13  $^1\text{H}$  NMR spectrum of **5** in  $\text{CD}_2\text{Cl}_2$ .

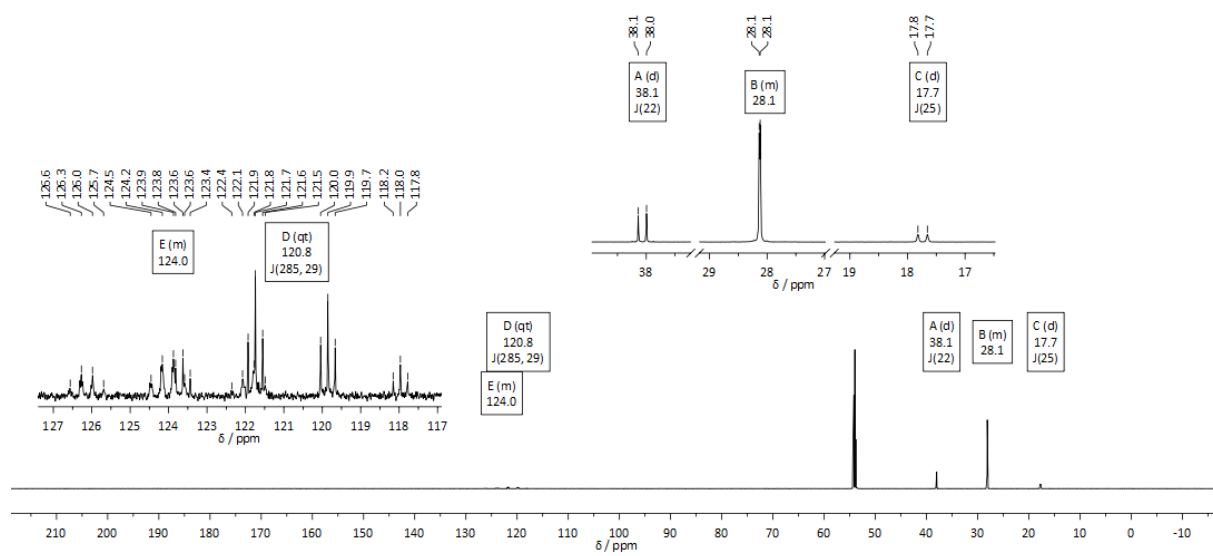

Figure S14  $^{13}\text{C}\{^1\text{H}\}$  NMR spectrum of **5** in  $\text{CD}_2\text{Cl}_2$ .

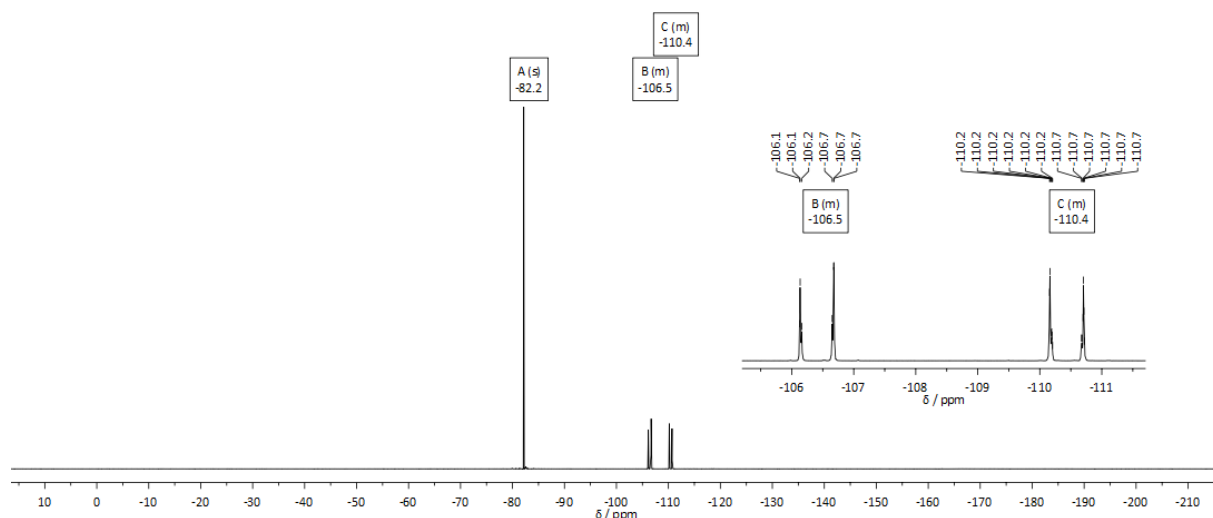

Figure S15  $^{19}\text{F}$  NMR spectrum of **5** in  $\text{CD}_2\text{Cl}_2$ .

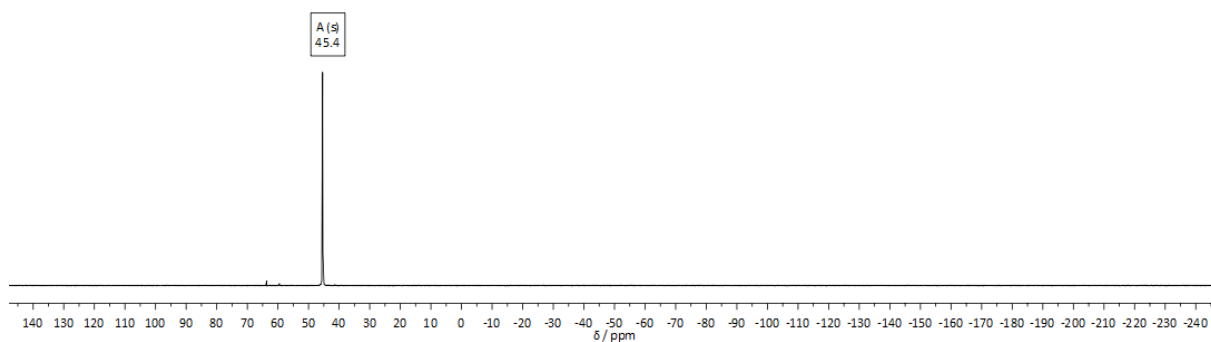

Figure S16  $^{31}\text{P}\{^1\text{H}\}$  NMR spectrum of **5** in  $\text{CD}_2\text{Cl}_2$ .

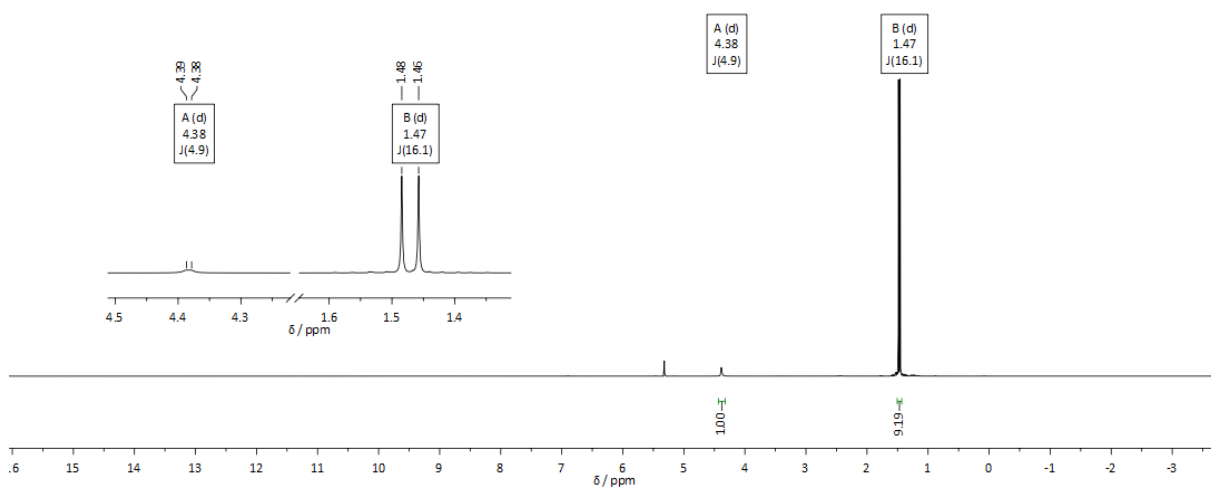

Figure S17  $^1\text{H}$  NMR spectrum of **6** in  $\text{CD}_2\text{Cl}_2$ .

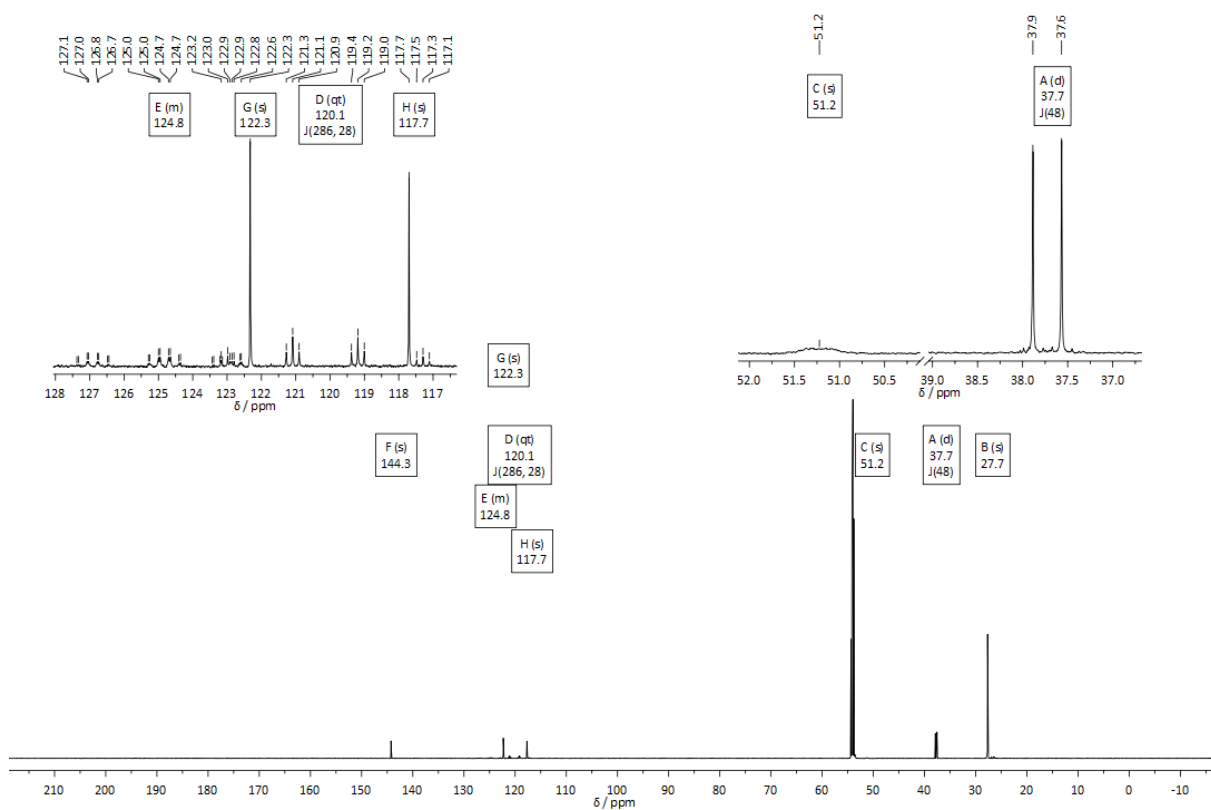

Figure S18  $^{13}\text{C}\{^1\text{H}\}$  NMR spectrum of **6** in  $\text{CD}_2\text{Cl}_2$ .

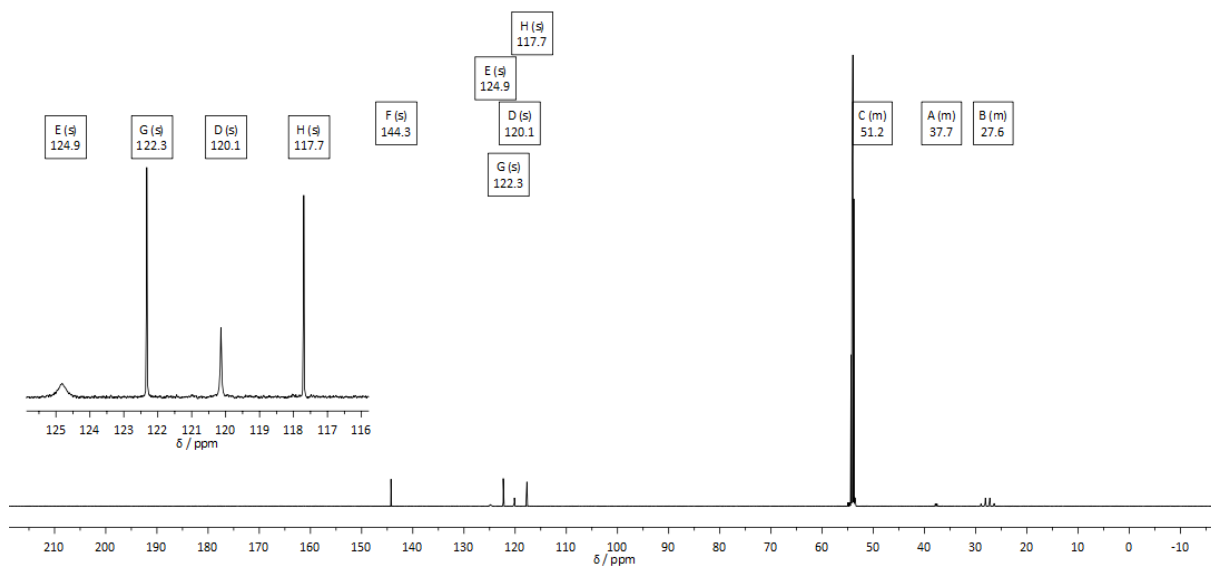

Figure S19  $^{13}\text{C}\{^{19}\text{F}\}$  NMR spectrum of **6** in  $\text{CD}_2\text{Cl}_2$ .

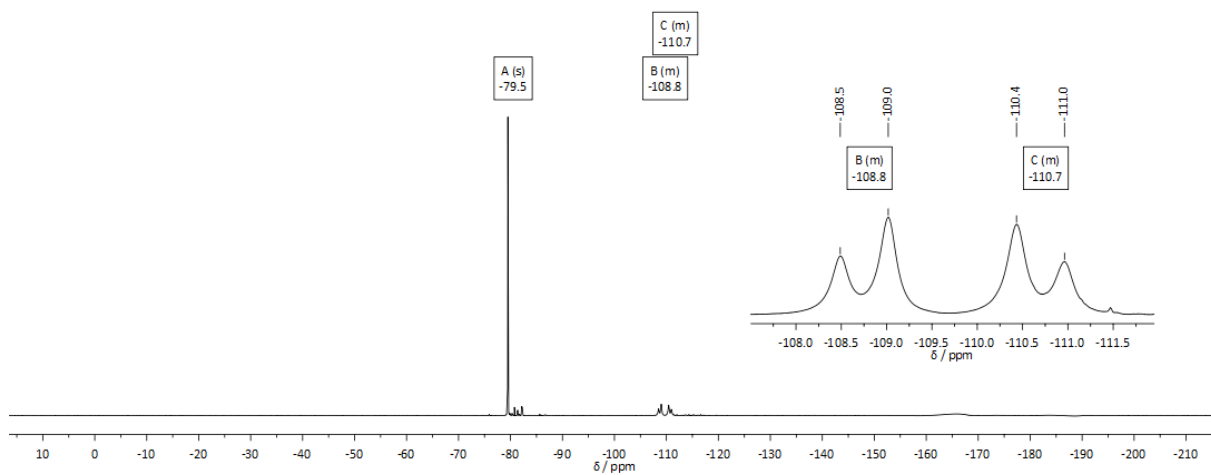

Figure S20  $^{19}\text{F}$  NMR spectrum of **6** in  $\text{CD}_2\text{Cl}_2$ .

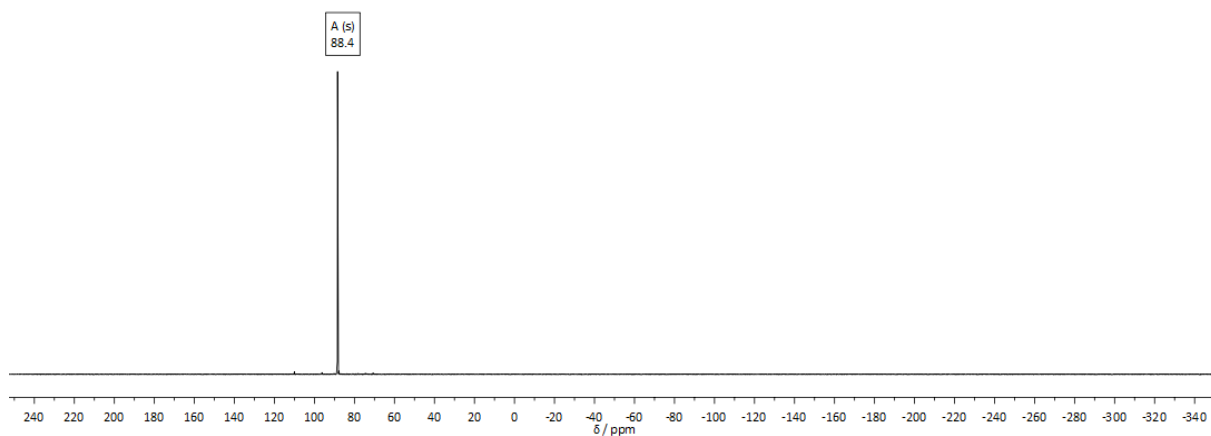

Figure S21  $^{31}\text{P}\{^1\text{H}\}$  NMR spectrum of **6** in  $\text{CD}_2\text{Cl}_2$ .

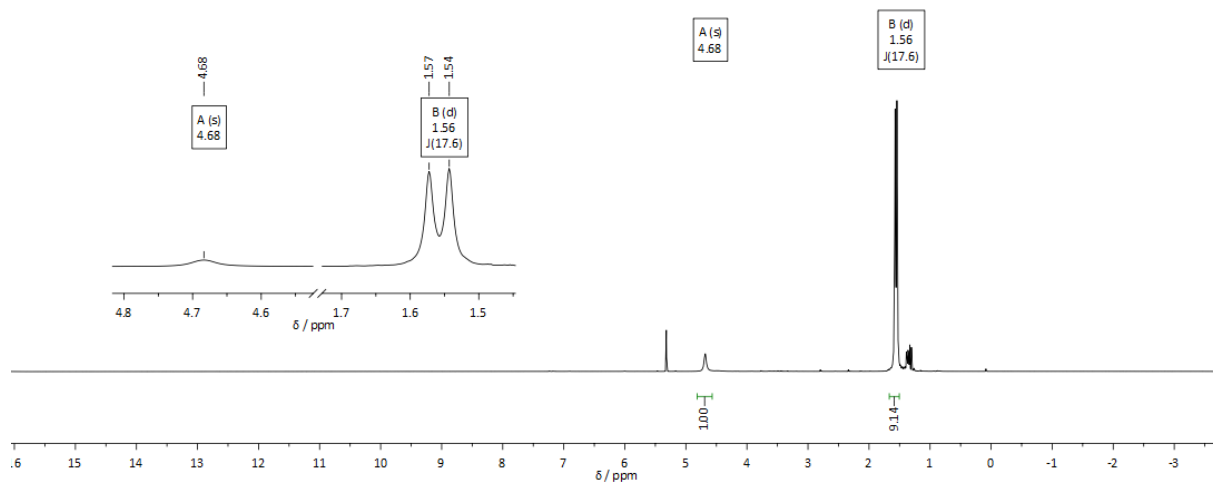

Figure S22  $^1\text{H}$  NMR spectrum of **7** in  $\text{CD}_2\text{Cl}_2$ .

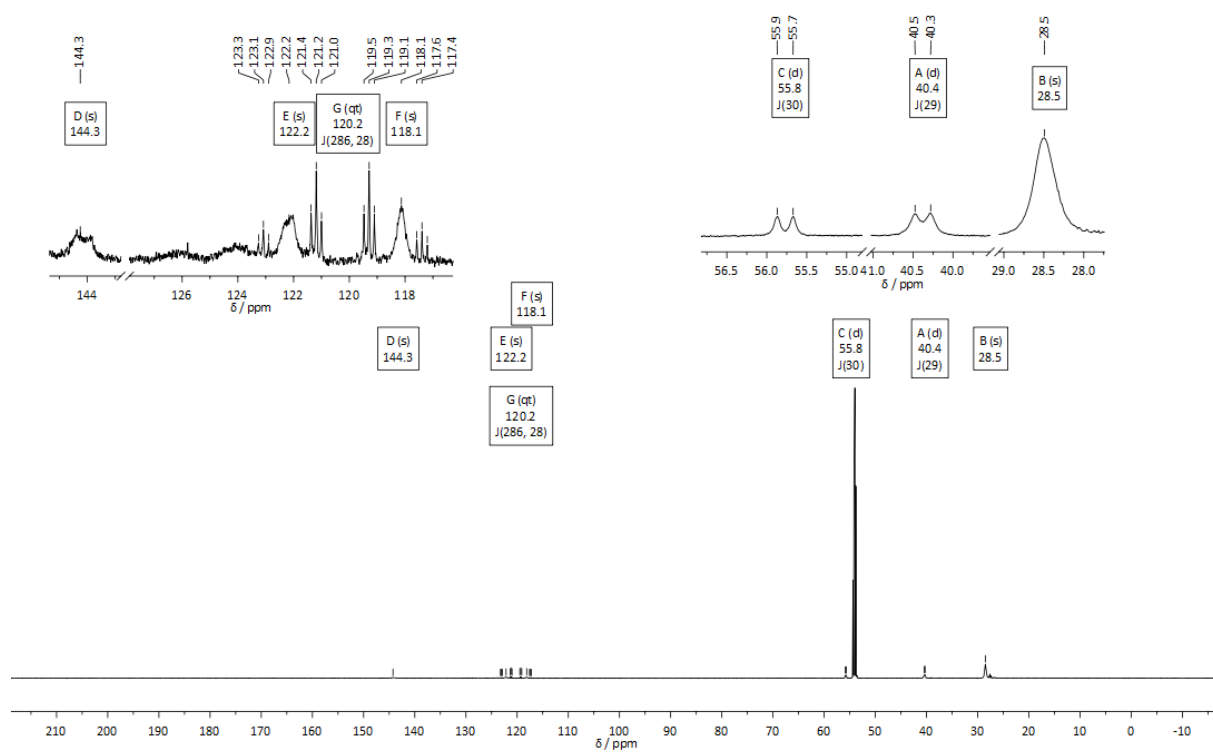

Figure S23  $^{13}\text{C}\{^1\text{H}\}$  NMR spectrum of **7** in  $\text{CD}_2\text{Cl}_2$ .



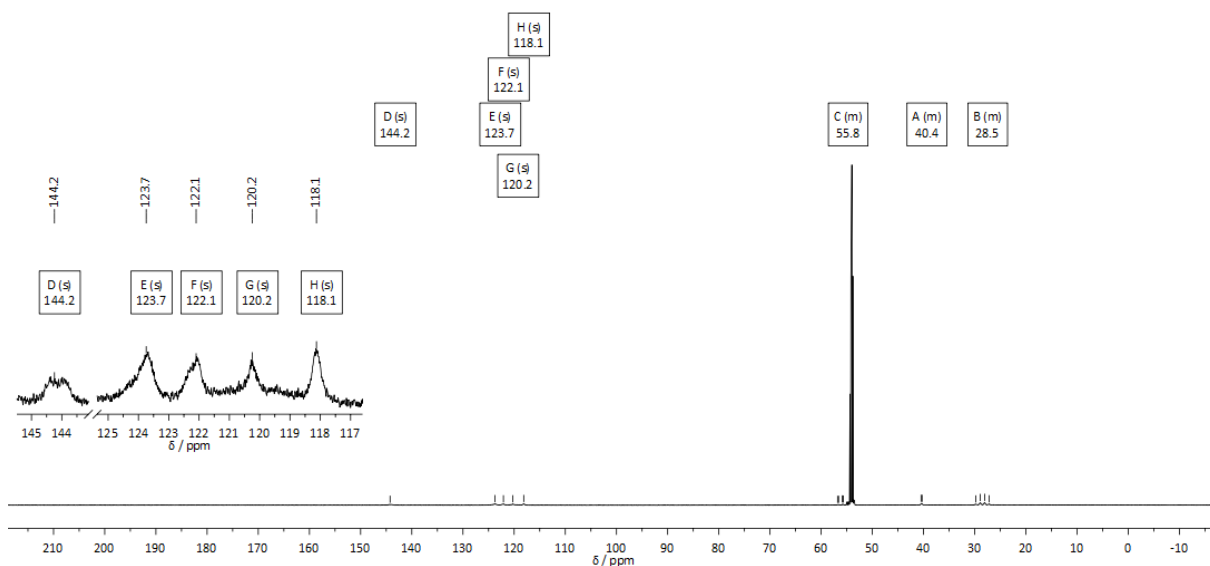

Figure S24  $^{13}\text{C}\{^{19}\text{F}\}$  NMR spectrum of **7** in  $\text{CD}_2\text{Cl}_2$ .

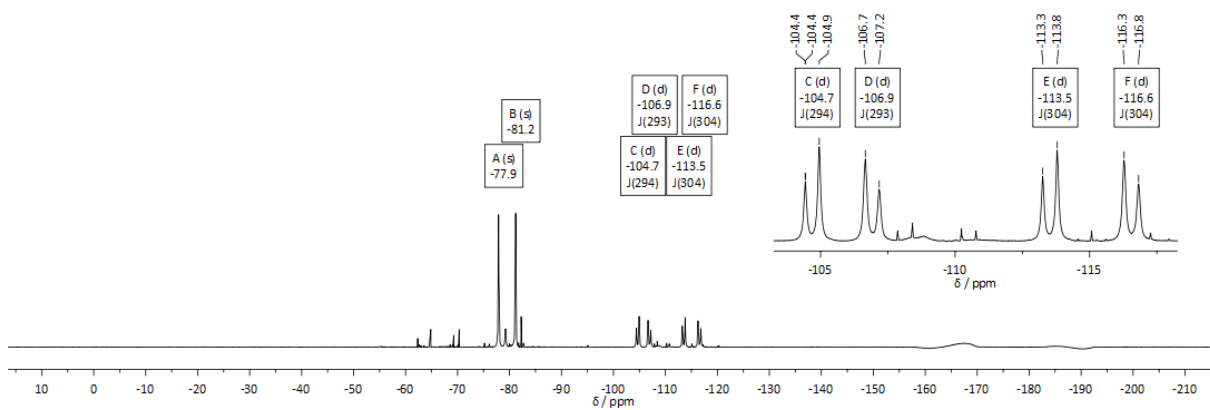

Figure S25  $^{19}\text{F}$  NMR spectrum of **7** in  $\text{CD}_2\text{Cl}_2$ .

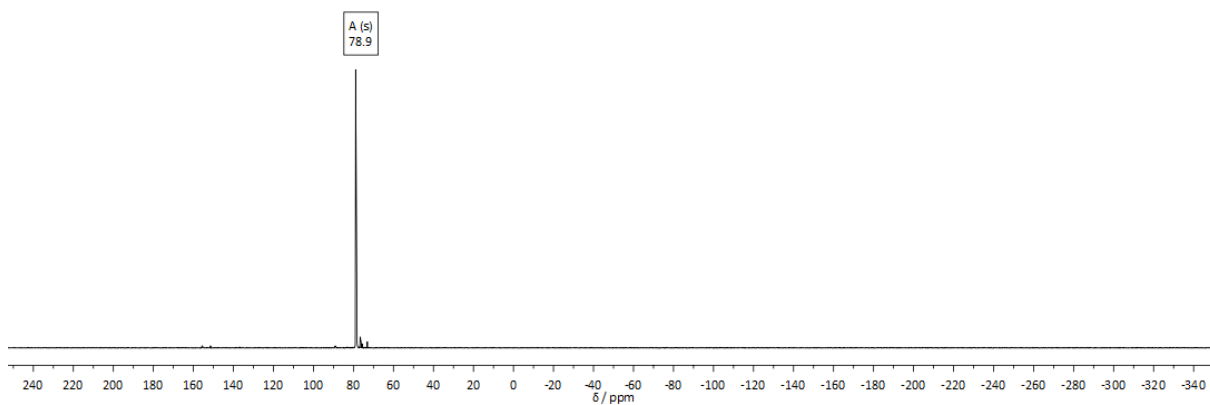

Figure S26  $^{31}\text{P}\{^1\text{H}\}$  NMR spectrum of **7** in  $\text{CD}_2\text{Cl}_2$ .

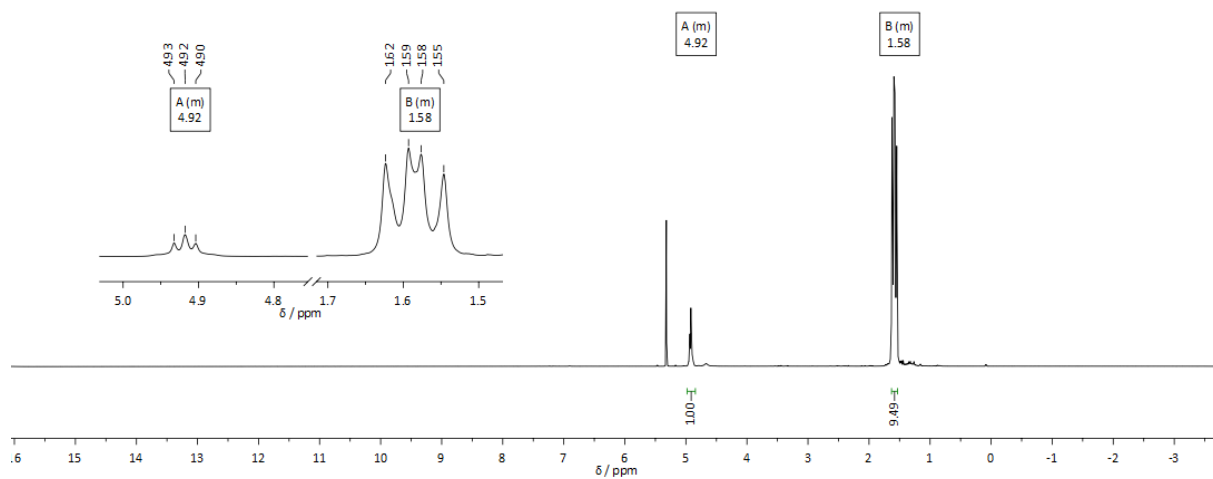

**Figure S27**  $^1\text{H}$  NMR spectrum of **8** in  $\text{CD}_2\text{Cl}_2$ .

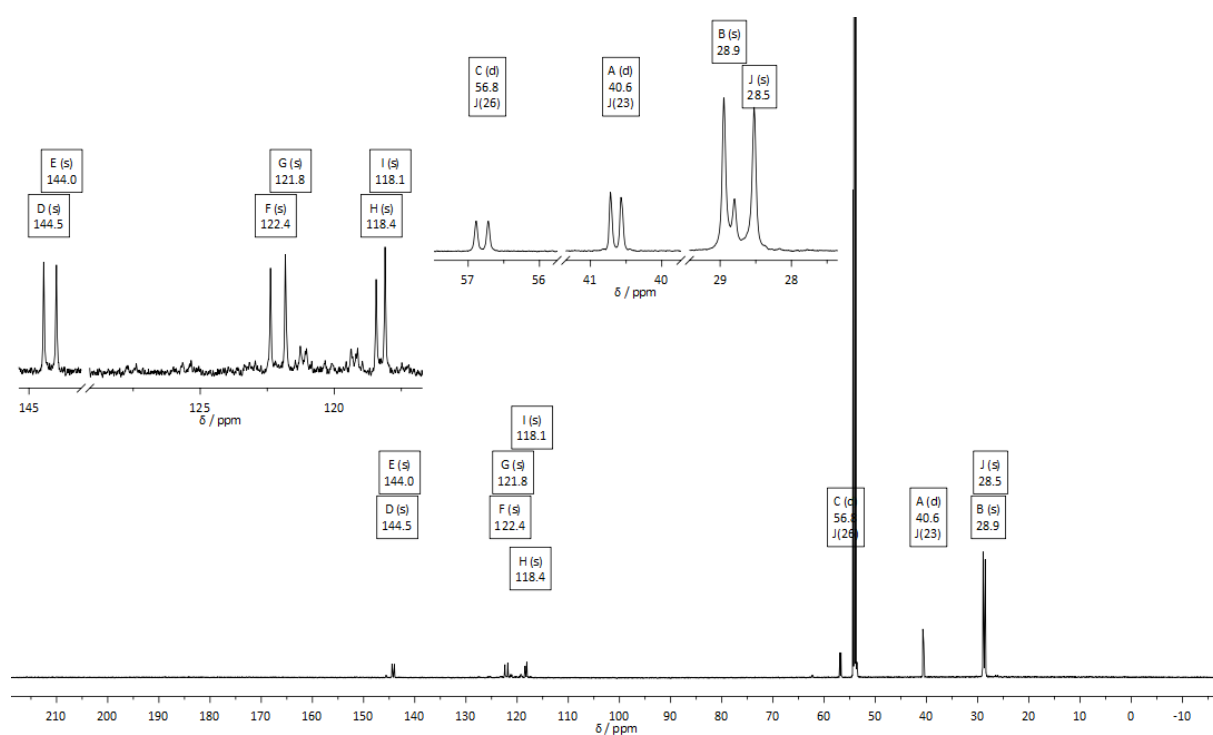

**Figure S28**  $^{13}\text{C}\{^1\text{H}\}$  NMR spectrum of **8** in  $\text{CD}_2\text{Cl}_2$ .

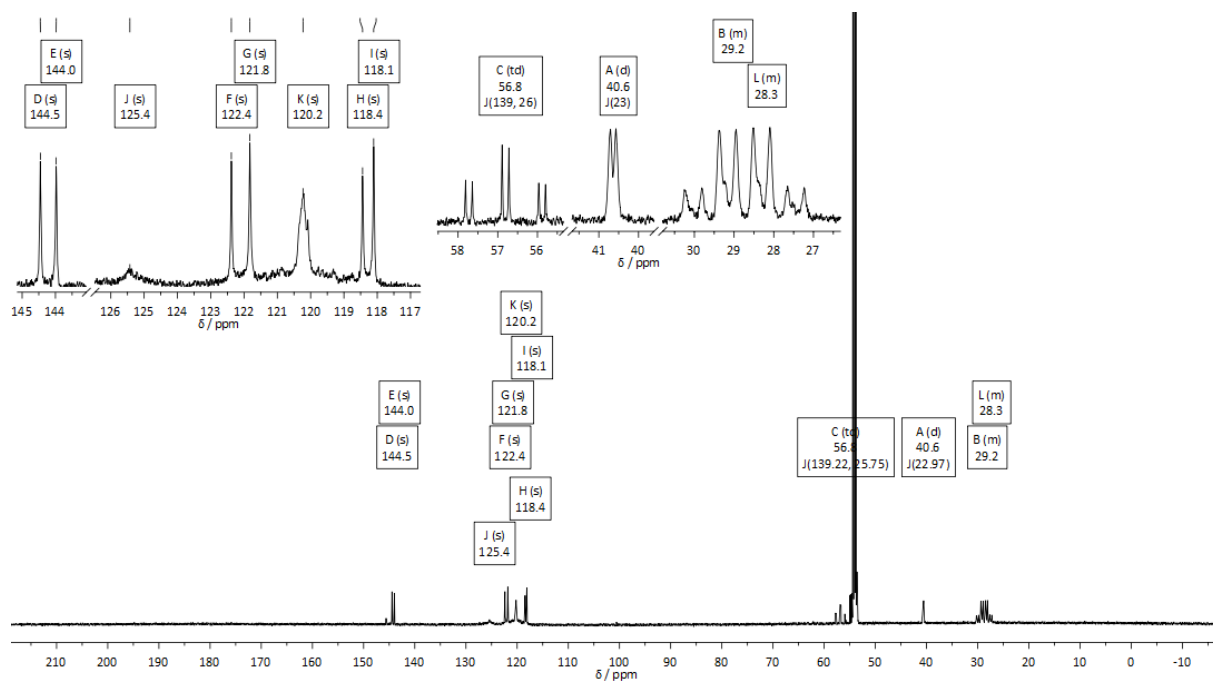

Figure S29  $^{13}\text{C}\{^{19}\text{F}\}$  NMR spectrum of **8** in  $\text{CD}_2\text{Cl}_2$ .

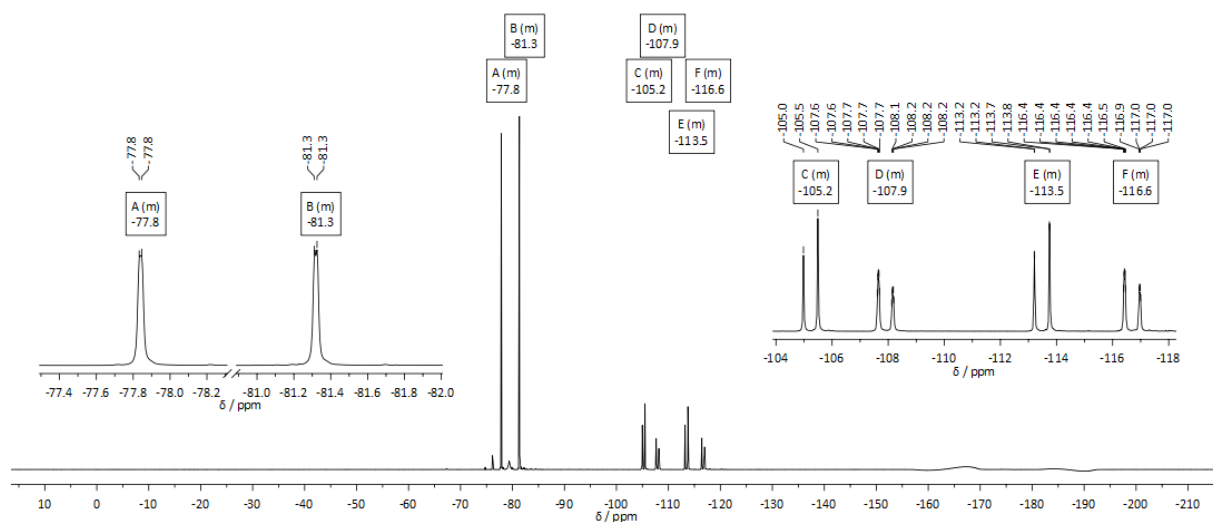

Figure S30  $^{19}\text{F}$  NMR spectrum of **8** in  $\text{CD}_2\text{Cl}_2$ .

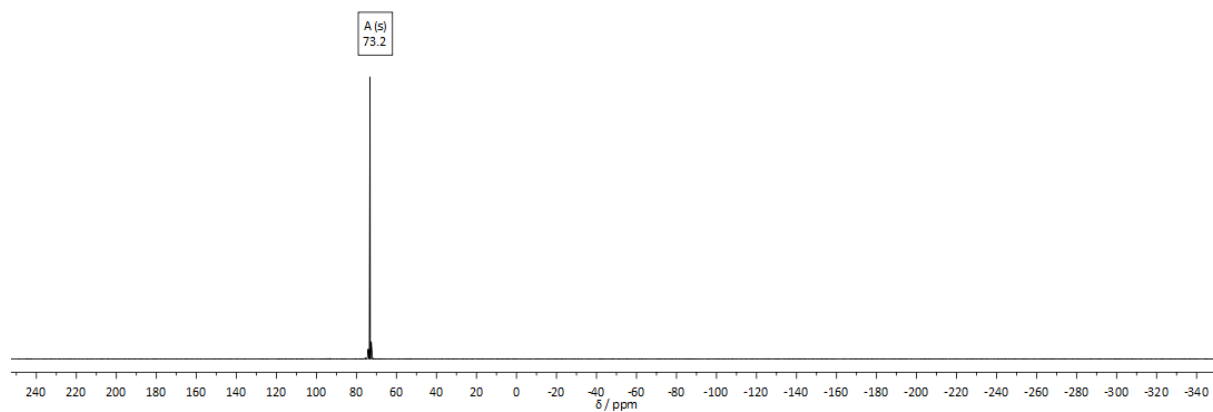

Figure S31  $^{31}\text{P}\{^1\text{H}\}$  NMR spectrum of **8** in  $\text{CD}_2\text{Cl}_2$ .

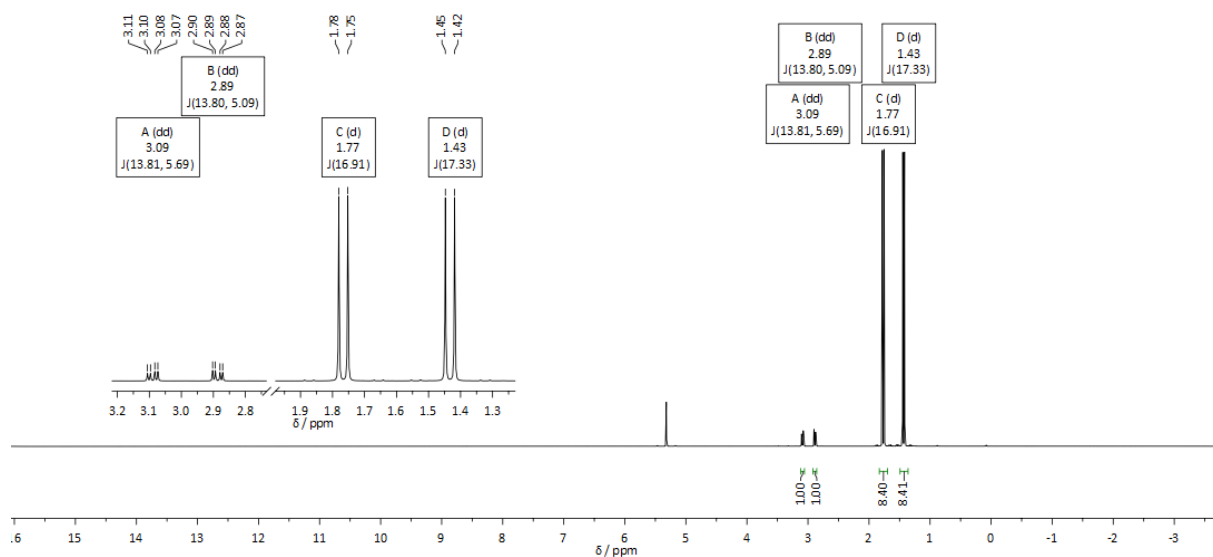

**Figure S32**  $^1\text{H}$  NMR spectrum of **9** in  $\text{CD}_2\text{Cl}_2$ .

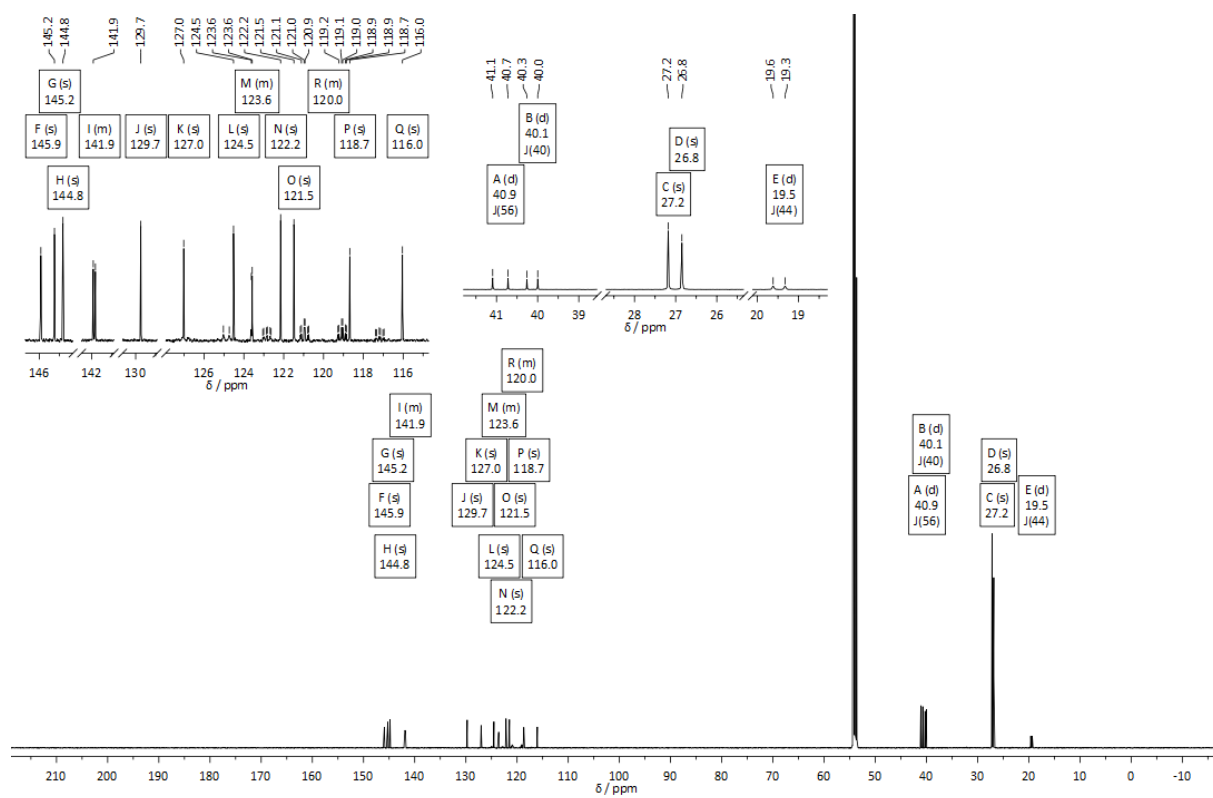

**Figure S33**  $^{13}\text{C}\{^1\text{H}\}$  NMR spectrum of **9** in  $\text{CD}_2\text{Cl}_2$ .

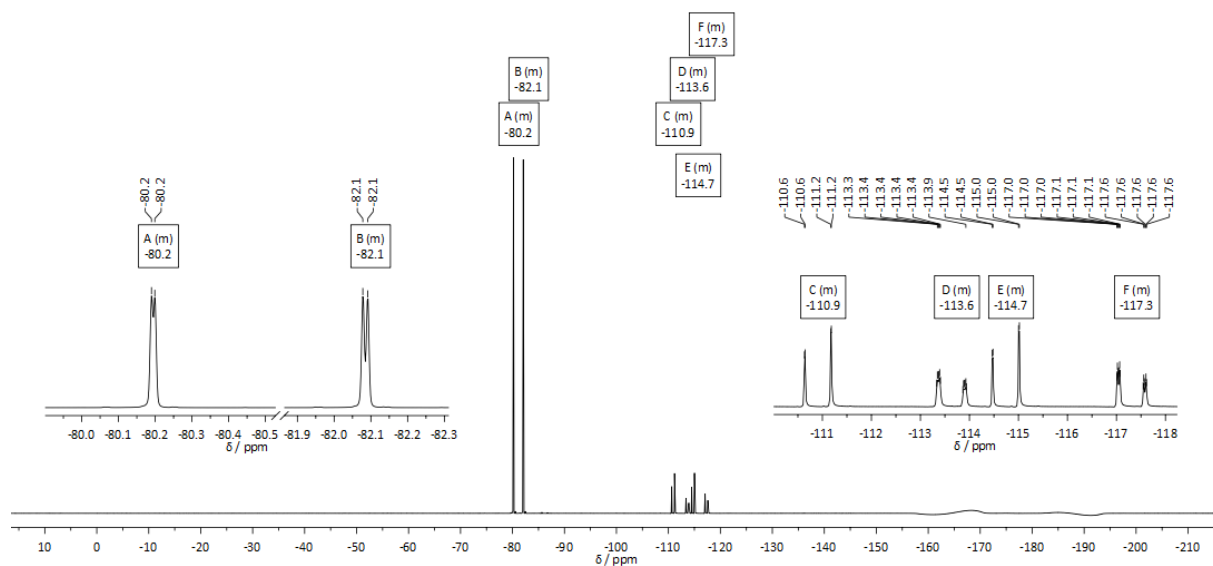

Figure S34  $^{19}\text{F}$  NMR spectrum of **9** in  $\text{CD}_2\text{Cl}_2$ .

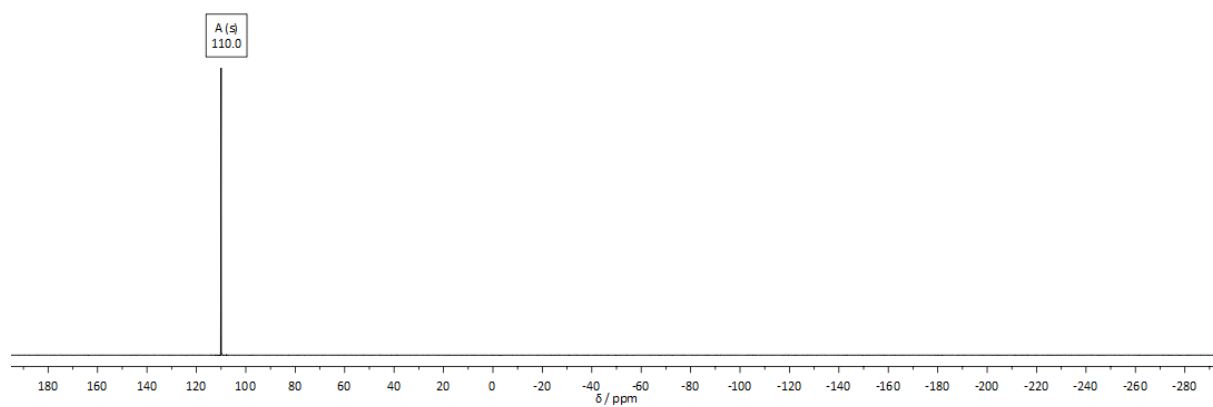

Figure S35  $^{31}\text{P}\{^1\text{H}\}$  NMR spectrum of **9** in  $\text{CD}_2\text{Cl}_2$ .

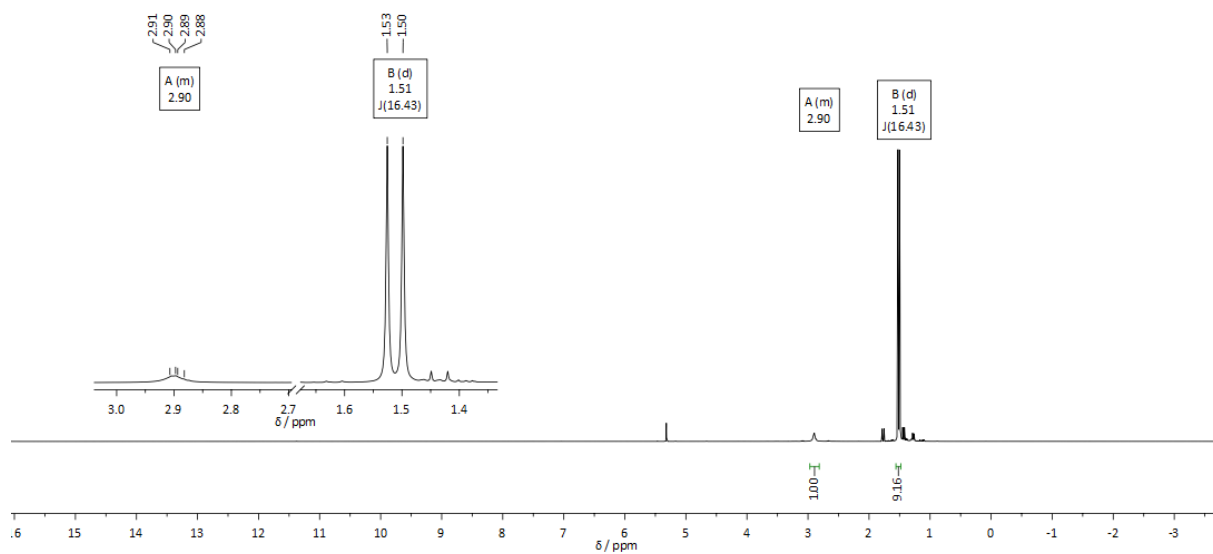

Figure S36  $^1\text{H}$  NMR spectrum of **10** in  $\text{CD}_2\text{Cl}_2$ .

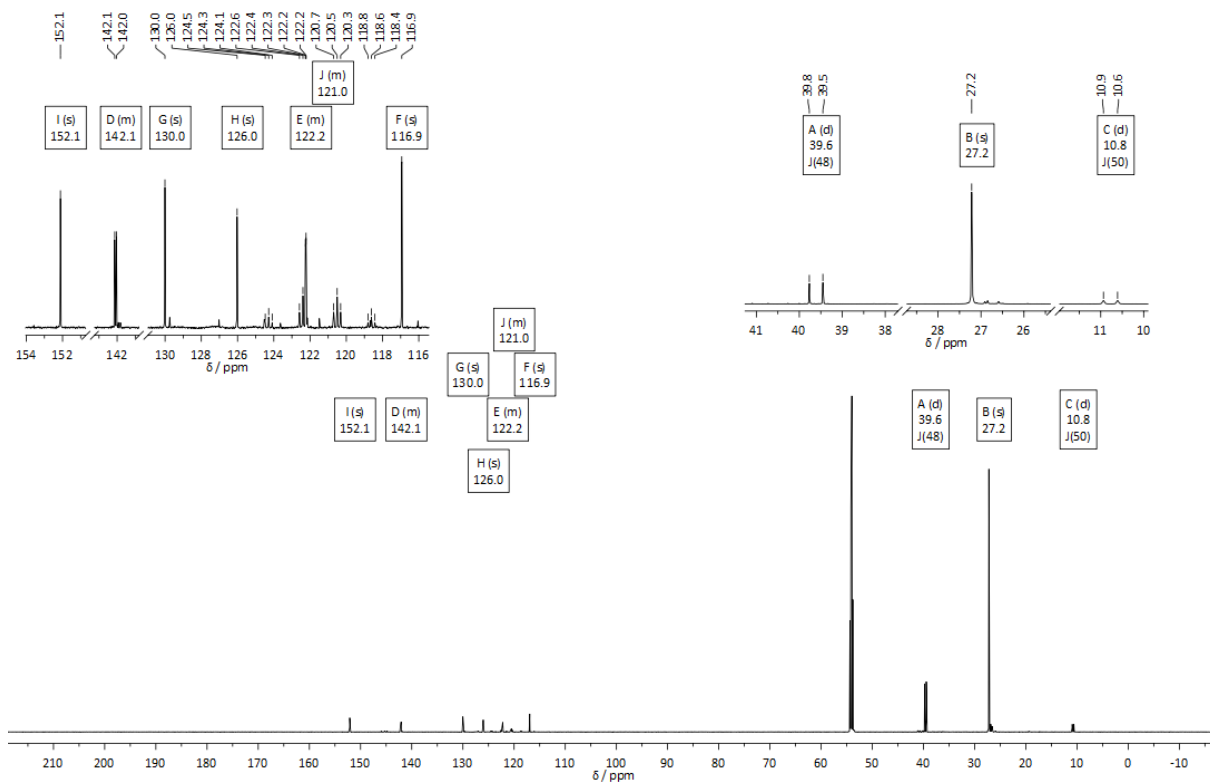

**Figure S37**  $^{13}\text{C}\{^1\text{H}\}$  NMR spectrum of **10** in  $\text{CD}_2\text{Cl}_2$ .

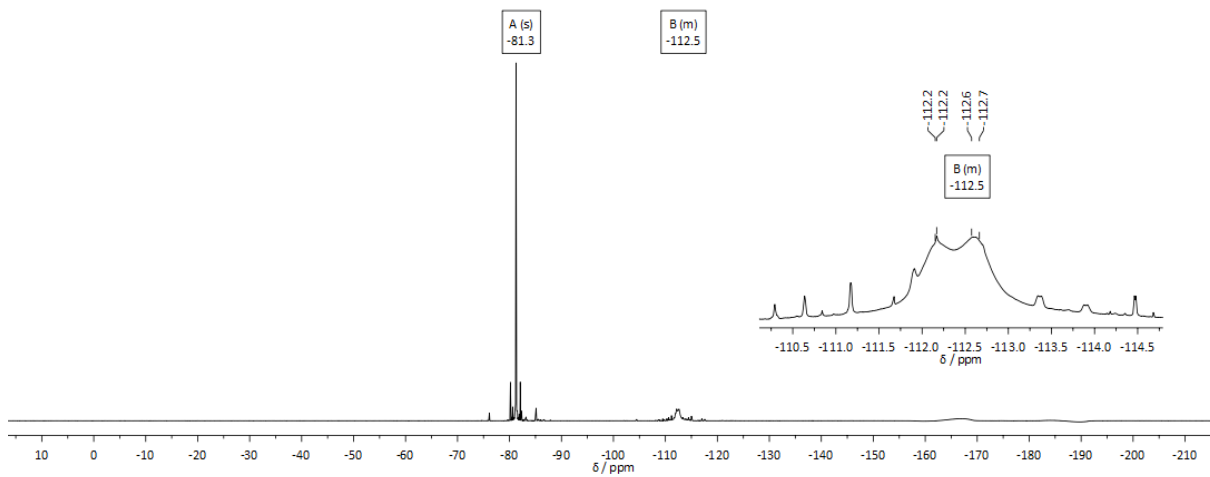

**Figure S38**  $^{19}\text{F}$  NMR spectrum of **10** in  $\text{CD}_2\text{Cl}_2$ .

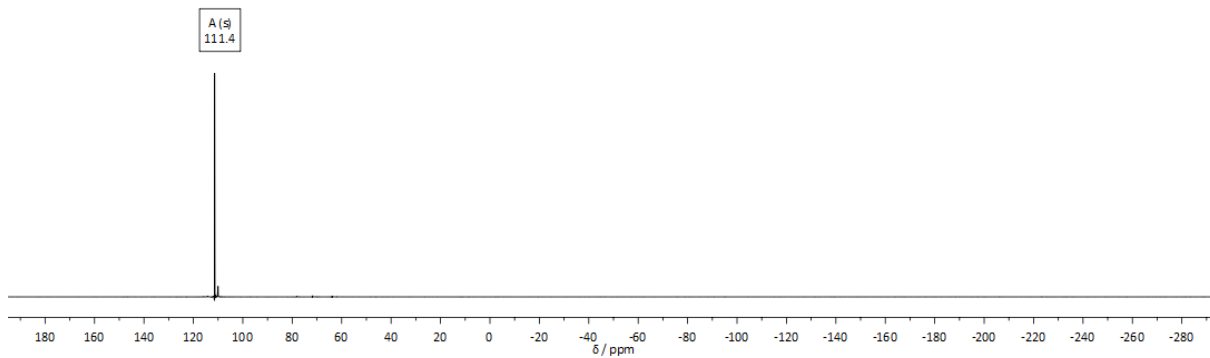

**Figure S39**  $^{31}\text{P}\{^1\text{H}\}$  NMR spectrum of **10** in  $\text{CD}_2\text{Cl}_2$ .

## Crystallographic data

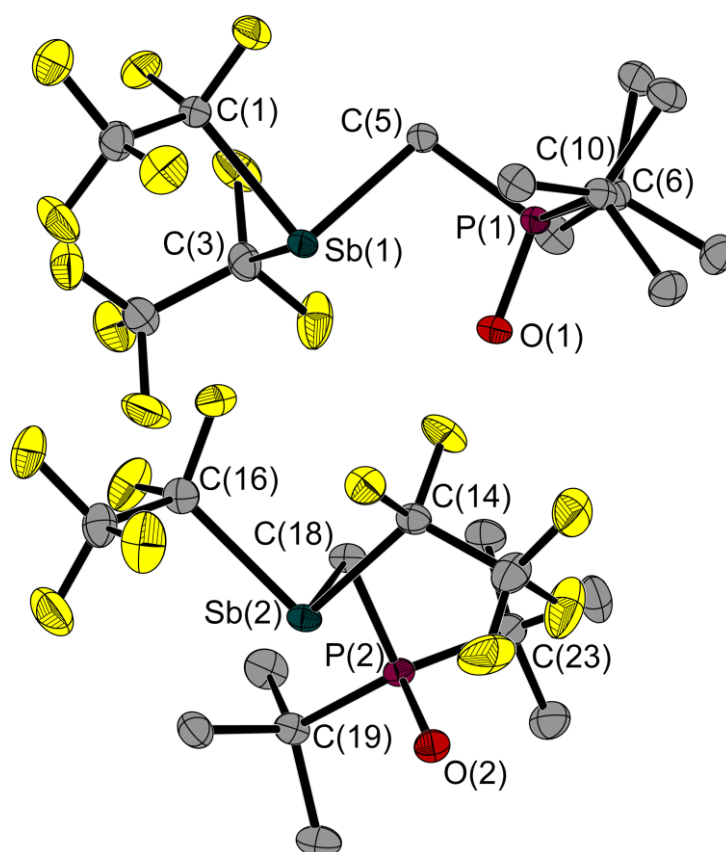

**Figure S40** Molecular structure of compound **2** in the solid state. Ellipsoids are set at 50 % probability; hydrogen atoms are omitted for clarity. Selected bond lengths, atom distances [Å] and angles [°]: Sb(1)–C(1) 2.260(3), Sb(1)–C(3) 2.236(4), Sb(1)–C(5) 2.174(3), P(1)–C(5) 1.812(3), P(1)–C(6) 1.844(4), P(1)–C(10) 1.858(3), P(1)–O(1) 1.509(3), P(2)–O(2) 1.504(3), Sb(1)···O(1) 2.784(3), Sb(2)···O(2) 2.888(3); C(1)–Sb(1)–C(3) 94.8(1), C(1)–Sb(1)–C(5) 91.6(2), C(1)–Sb(1)–O(1) 153.9(1), C(5)–Sb(1)–C(3) 91.2(2), C(5)–P(1)–C(6) 107.7(2), C(5)–P(1)–C(10) 107.3(2), C(6)–P(1)–C(10) 114.4(2), O(1)–P(1)–C(5) 106.0(2), O(1)–P(1)–C(6) 111.6(2), O(1)–P(1)–C(10) 109.3(2), P(1)–C(5)–Sb(1) 100.7(2), P(2)–C(18)–Sb(2) 102.2(2).

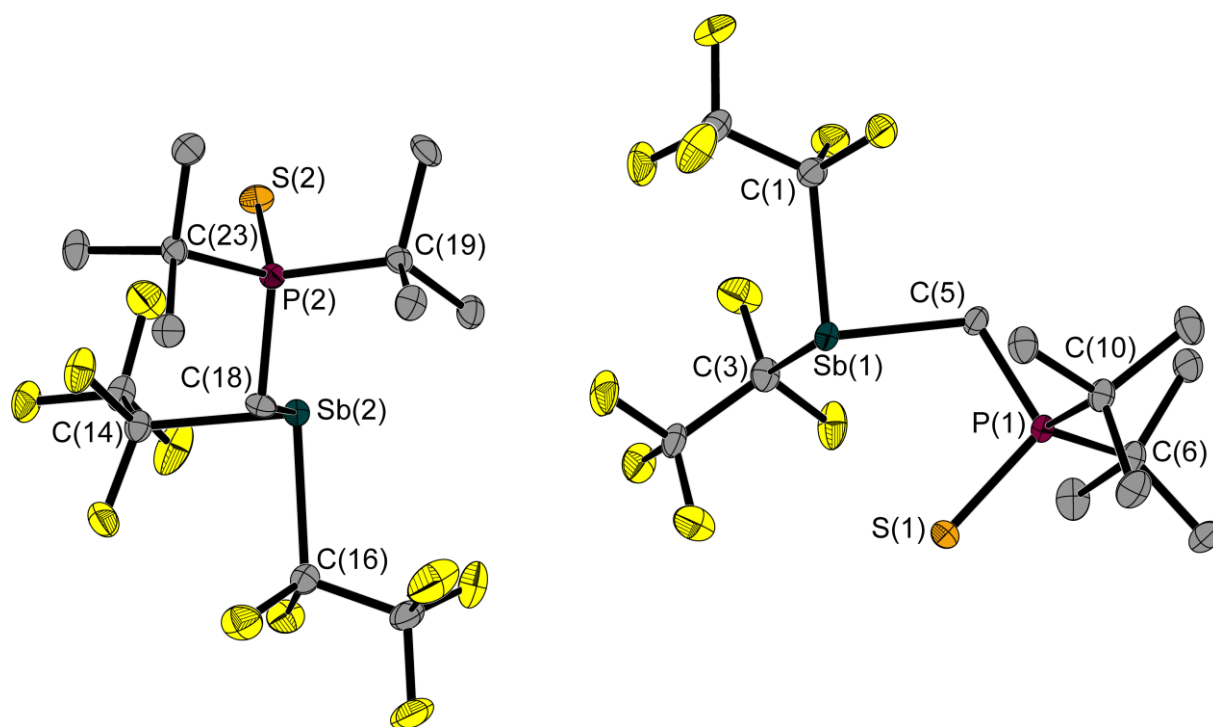

**Figure S41** Molecular structure of compound **3** in the solid state. Ellipsoids are set at 50 % probability; hydrogen atoms are omitted for clarity. Selected bond lengths, atom distances [Å] and angles [°]: Sb(1)–C(1) 2.269(6), Sb(1)–C(3) 2.260(5), Sb(1)–C(5) 2.176(5), P(1)–C(5) 1.813(5), P(1)–C(6) 1.871(5), P(1)–C(10) 1.873(5), P(1)–S(1) 1.982(2), P(2)–S(2) 1.976(2), Sb(1)⋯S(1) 3.145(1), Sb(2)⋯S(2) 3.108(1); C(1)–Sb(1)–C(3) 93.7(2), C(1)–Sb(1)–C(5) 86.4(2), C(1)–Sb(1)–S(1) 153.4(2), C(5)–Sb(1)–C(3) 94.0(2), C(5)–P(1)–C(6) 106.3(2), C(5)–P(1)–C(10) 106.7(2), C(6)–P(1)–C(10) 113.5(2), S(1)–P(1)–C(5) 106.9(2), S(1)–P(1)–C(6) 112.4(2), S(1)–P(1)–C(10) 110.5(2), P(1)–C(5)–Sb(1) 106.8(2), P(2)–C(18)–Sb(2) 106.0(2).



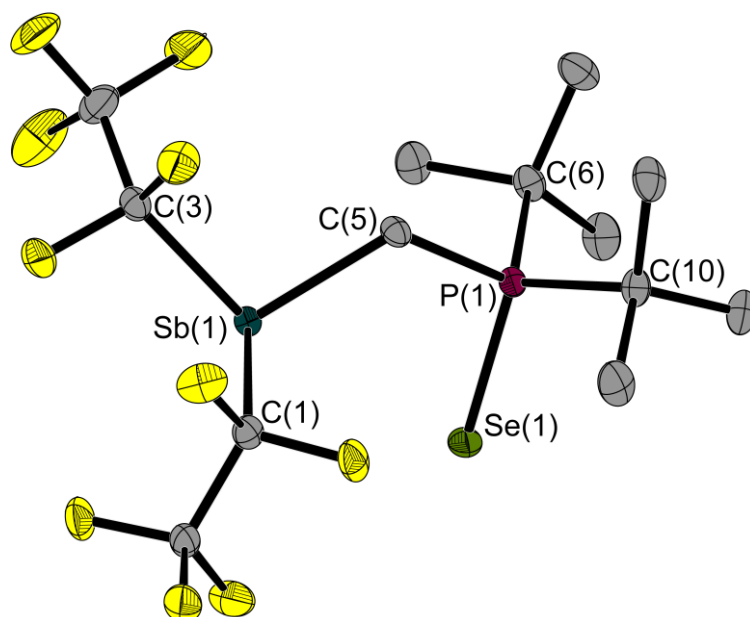

**Figure S42** Molecular structure of compound **4** in the solid state. Ellipsoids are set at 50 % probability; hydrogen atoms are omitted for clarity. Selected bond lengths, atom distances [Å] and angles [°]: Sb(1)–C(1) 2.257(2), Sb(1)–C(3) 2.272(2), Sb(1)–C(5) 2.178(2), P(1)–C(5) 1.820(2), P(1)–C(6) 1.874(2), P(1)–C(10) 1.873(2), P(1)–Se(1) 2.131(2), Sb(1)⋯Se(1) 3.171(1); C(1)–Sb(1)–C(3) 87.6(1), C(1)–Sb(1)–C(5) 93.1(1), C(3)–Sb(1)–Se(1) 161.0(1), C(5)–Sb(1)–C(3) 91.6(1), C(5)–P(1)–C(6) 106.9(1), C(5)–P(1)–C(10) 106.9(1), C(6)–P(1)–C(10) 113.7(1), Se(1)–P(1)–C(5) 106.1(1), Se(1)–P(1)–C(6) 110.4(1), Se(1)–P(1)–C(10) 112.4(1), P(1)–C(5)–Sb(1) 107.6(1).

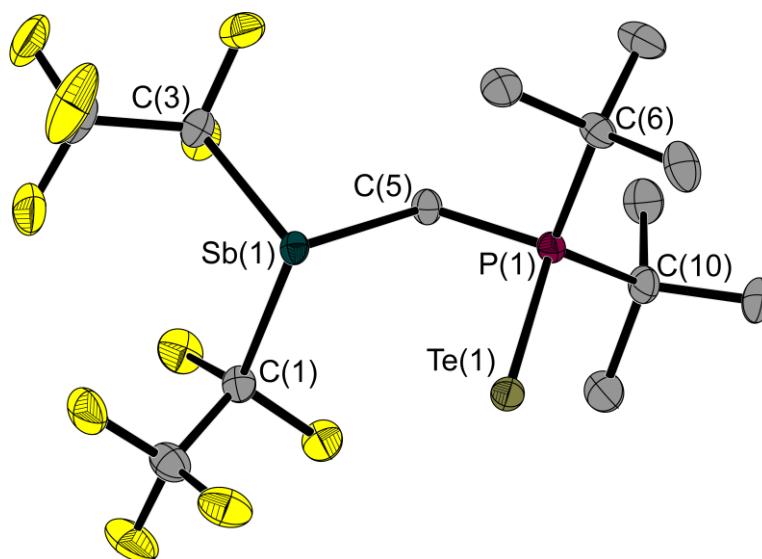

**Figure S43** Molecular structure of compound **5** in the solid state. Ellipsoids are set at 50 % probability; hydrogen atoms are omitted for clarity. Selected bond lengths, atom distances [Å] and angles [°]: Sb(1)–C(1) 2.259(2), Sb(1)–C(3) 2.282(2), Sb(1)–C(5) 2.176(2), P(1)–C(5) 1.824(2), P(1)–C(6) 1.878(2), P(1)–C(10) 1.876(2), P(1)–Te(1) 2.382(2), Sb(1)⋯Te(1) 3.362(1); C(1)–Sb(1)–C(3) 91.7(1), C(1)–Sb(1)–C(5) 94.0(1), C(3)–Sb(1)–Te(1) 157.8(1), C(5)–Sb(1)–C(3) 86.3(1), C(5)–P(1)–C(6) 106.6(1), C(5)–P(1)–C(10) 105.9(1), C(6)–P(1)–C(10) 114.2(1), Te(1)–P(1)–C(5) 105.9(1), Te(1)–P(1)–C(6) 110.6(1), Te(1)–P(1)–C(10) 113.0(1), P(1)–C(5)–Sb(1) 109.1(1).

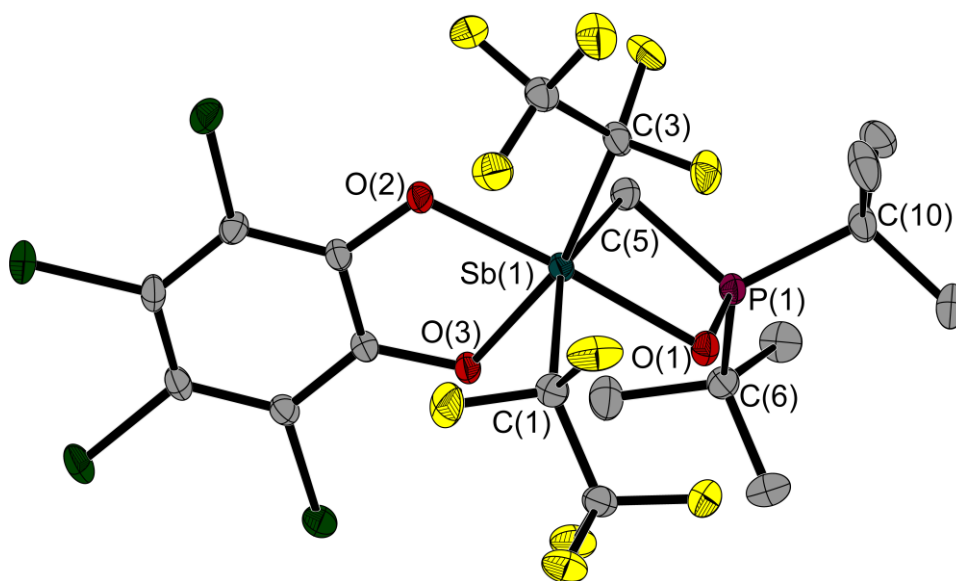

**Figure S44** Molecular structure of compound **6** in the solid state. Ellipsoids are set at 50 % probability; hydrogen atoms are omitted for clarity. Selected bond lengths [Å] and angles [°]: Sb(1)–C(1) 2.240(2), Sb(1)–C(3) 2.279(2), Sb(1)–C(5) 2.194(2), Sb(1)–O(1) 2.158(1), Sb(1)–O(2) 2.009(1), Sb(1)–O(3) 2.044(1), P(1)–C(5) 1.809(2), P(1)–C(6) 1.853(2), P(1)–C(10) 1.844(2), P(1)–O(1) 1.567(1); C(1)–Sb(1)–C(3) 93.2(1), C(1)–Sb(1)–C(5) 154.8(1), C(5)–Sb(1)–C(3) 96.3(1), O(1)–Sb(1)–C(1) 83.8(1), O(1)–Sb(1)–C(3) 103.5(1), O(1)–Sb(1)–C(5) 71.2(1), O(1)–Sb(1)–O(2) 173.3(1), O(1)–Sb(1)–O(3) 93.1(1), O(2)–Sb(1)–C(1) 98.6(1), O(2)–Sb(1)–C(3) 82.6(1), O(2)–Sb(1)–C(5) 105.7(1), O(2)–Sb(1)–O(3) 80.9(1), O(3)–Sb(1)–C(1) 85.3(1), O(3)–Sb(1)–C(3) 163.0(1), O(3)–Sb(1)–C(5) 92.1(1), C(5)–P(1)–C(6) 113.6(1), C(5)–P(1)–C(10) 111.3(1), C(6)–P(1)–C(10) 114.2(1), O(1)–P(1)–C(5) 97.0(1), O(1)–P(1)–C(6) 109.5(1), O(1)–P(1)–C(10) 109.9(1), P(1)–C(5)–Sb(1) 91.5(1), P(1)–O(1)–Sb(1) 100.0(1).

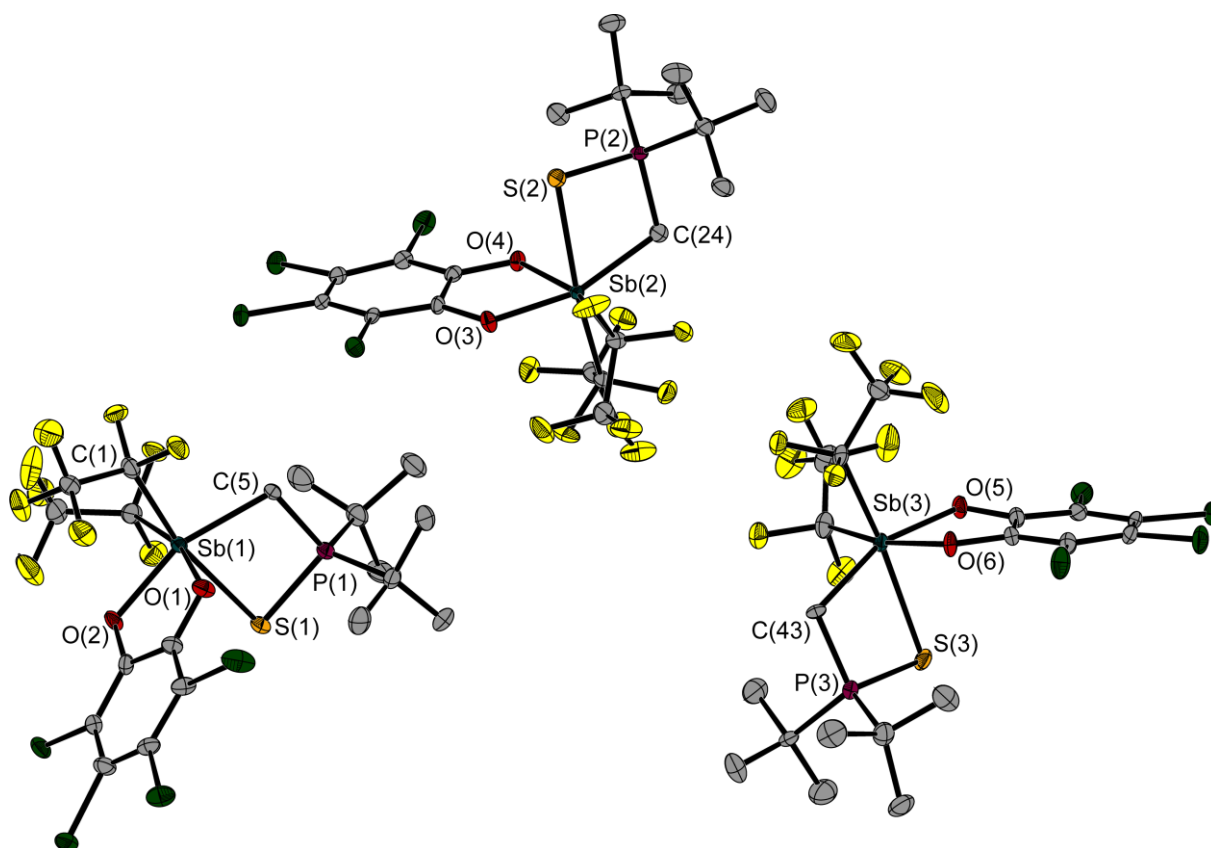

**Figure S45** Molecular structure of compound **7** in the solid state. Ellipsoids are set at 50 % probability; hydrogen atoms are omitted for clarity. Selected bond lengths [Å] and angles [°]: Sb(1)–C(1) 2.231(7), Sb(1)–C(4) 2.259(6), Sb(1)–C(5) 2.178(6), Sb(1)–S(1) 2.633(2), Sb(2)–S(2) 2.619(2), Sb(3)–S(3) 2.621(2), Sb(1)–O(1) 2.052(4), Sb(1)–O(2) 2.027(4), P(1)–C(5) 1.811(6), P(1)–C(6) 1.880(8), P(1)–C(10) 1.866(7), P(1)–S(1) 2.036(2), P(2)–S(2) 2.036(2), P(3)–S(3) 2.031(2); C(1)–Sb(1)–C(4) 96.4(3), C(1)–Sb(1)–C(5) 92.6(2), C(5)–Sb(1)–C(4) 103.1(2), S(1)–Sb(1)–C(1) 167.2(2), S(1)–Sb(1)–C(4) 91.5(2), S(1)–Sb(1)–C(5) 75.8(2), S(1)–Sb(1)–O(1) 89.9(2), S(1)–Sb(1)–O(2) 86.5(2), O(1)–Sb(1)–C(1) 84.8(2), O(1)–Sb(1)–C(4) 166.3(2), O(1)–Sb(1)–C(5) 90.4(2), O(1)–Sb(1)–O(2) 80.6(2), O(2)–Sb(1)–C(1) 104.1(2), O(2)–Sb(1)–C(4) 86.0(2), O(2)–Sb(1)–C(5) 160.1(2), C(5)–P(1)–C(6) 110.3(3), C(5)–P(1)–C(10) 109.4(3), C(6)–P(1)–C(10) 114.0(4), S(1)–P(1)–C(5) 101.2(2), S(1)–P(1)–C(6) 109.4(2), S(1)–P(1)–C(10) 111.8(2), P(1)–C(5)–Sb(1) 101.2(3), P(2)–C(24)–Sb(2) 101.4(3), P(3)–C(43)–Sb(3) 100.9(3), P(1)–S(1)–Sb(1) 81.8(1), P(2)–S(2)–Sb(2) 81.9(1), P(3)–S(3)–Sb(3) 82.1(1).

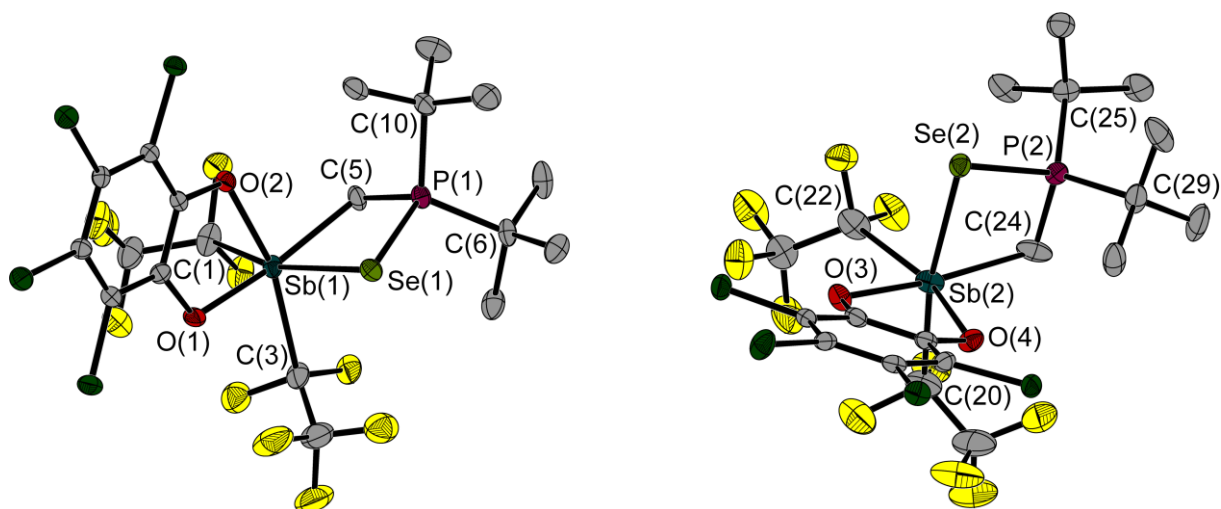

**Figure S46** Molecular structure of compound **8** in the solid state. Ellipsoids are set at 30 % probability; hydrogen atoms are omitted for clarity. Selected bond lengths [Å] and angles [°]: Sb(1)–C(1) 2.264(7), Sb(1)–C(3) 2.250(7), Sb(1)–C(5) 2.193(7), Sb(1)–Se(1) 2.748(1), Sb(2)–Se(2) 2.703(1), Sb(1)–O(1) 2.024(5), Sb(1)–O(2) 2.035(4), P(1)–C(5) 1.833(7), P(1)–C(6) 1.864(7), P(1)–C(10) 1.869(7), P(1)–Se(1) 2.194(2), P(2)–Se(2) 2.187(2); C(1)–Sb(1)–C(3) 91.4(3), C(1)–Sb(1)–C(5) 87.6(3), C(5)–Sb(1)–C(3) 104.7(3), Se(1)–Sb(1)–C(1) 164.9(2), Se(1)–Sb(1)–C(3) 95.7(2), Se(1)–Sb(1)–C(5) 77.7(2), Se(1)–Sb(1)–O(1) 96.3(2), Se(1)–Sb(1)–O(2) 89.4(2), O(1)–Sb(1)–C(1) 97.6(3), O(1)–Sb(1)–C(3) 84.7(3), O(1)–Sb(1)–C(5) 169.2(2), O(1)–Sb(1)–O(2) 80.4(2), O(2)–Sb(1)–C(1) 87.1(2), O(2)–Sb(1)–C(3) 164.8(3), O(2)–Sb(1)–C(5) 90.4(2), C(5)–P(1)–C(6) 108.9(3), C(5)–P(1)–C(10) 108.4(3), C(6)–P(1)–C(10) 114.9(3), Se(1)–P(1)–C(5) 101.5(2), Se(1)–P(1)–C(6) 110.8(3), Se(1)–P(1)–C(10) 111.5(2), P(1)–C(5)–Sb(1) 102.5(3), P(2)–C(24)–Sb(2) 102.5(3), P(1)–Se(1)–Sb(1) 78.2(1), P(2)–Se(2)–Sb(2) 79.4(1).

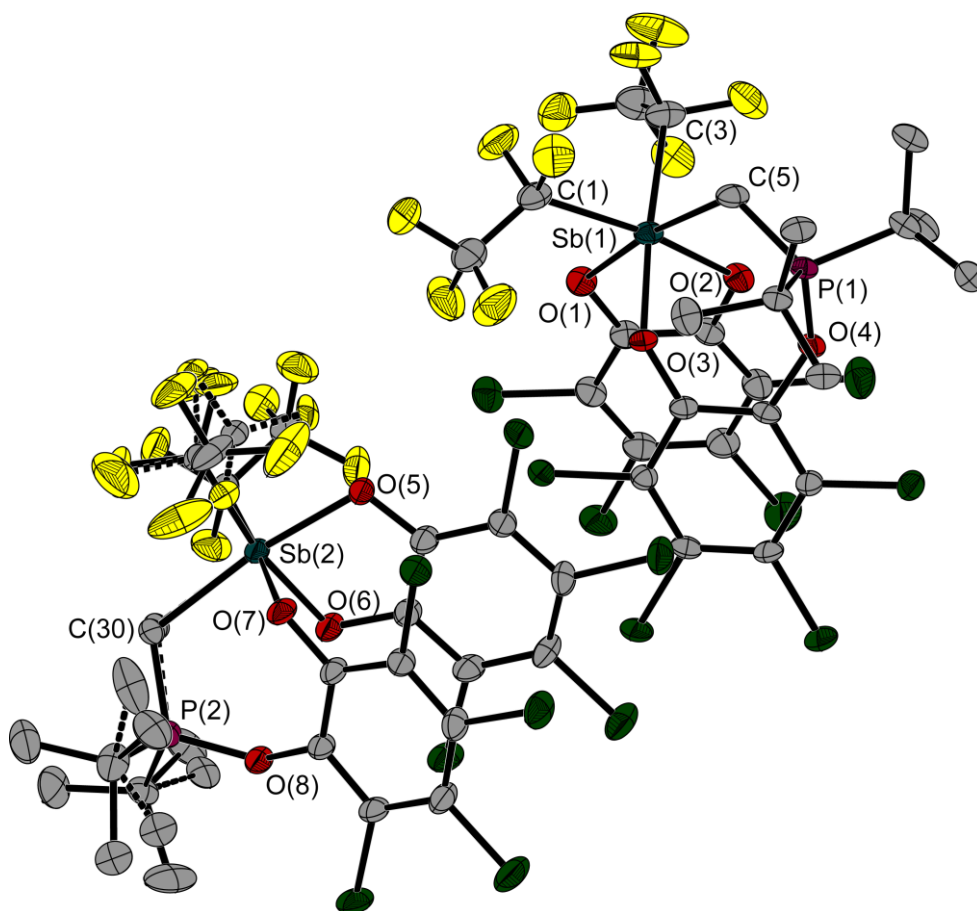

**Figure S47** Molecular structure of compound **9** in the solid state. Ellipsoids are set at 50 % probability; hydrogen atoms are omitted for clarity. Selected bond lengths [Å] and angles [°] for the non-disordered molecule: Sb(1)–C(1) 2.233(4), Sb(1)–C(3) 2.247(4), Sb(1)–C(5) 2.181(3), Sb(1)–O(1) 2.023(2), Sb(1)–O(2) 2.027(3), Sb(1)–O(3) 2.044(2), P(1)–C(5) 1.794(4), P(1)–C(6) 1.846(4), P(1)–C(10) 1.833(3), P(1)–O(4) 1.587(2); C(1)–Sb(1)–C(3) 93.7(2), C(1)–Sb(1)–C(5) 98.7(2), C(5)–Sb(1)–C(3) 89.7(2), O(1)–Sb(1)–C(1) 88.0(1), O(1)–Sb(1)–C(3) 94.5(2), O(1)–Sb(1)–C(5) 171.9(2), O(1)–Sb(1)–O(2) 81.2(1), O(1)–Sb(1)–O(3) 89.4(1), O(2)–Sb(1)–C(1) 169.1(1), O(2)–Sb(1)–C(3) 88.4(2), O(2)–Sb(1)–C(5) 92.0(2), O(2)–Sb(1)–O(3) 89.6(1), O(3)–Sb(1)–C(1) 89.1(1), O(3)–Sb(1)–C(3) 175.2(1), O(3)–Sb(1)–C(5) 86.1(1), C(5)–P(1)–C(6) 107.5(2), C(5)–P(1)–C(10) 110.6(2), C(6)–P(1)–C(10) 116.5(2), O(4)–P(1)–C(5) 113.8(2), O(4)–P(1)–C(6) 99.2(2), O(4)–P(1)–C(10) 109.0(2), P(1)–C(5)–Sb(1) 118.4(2).

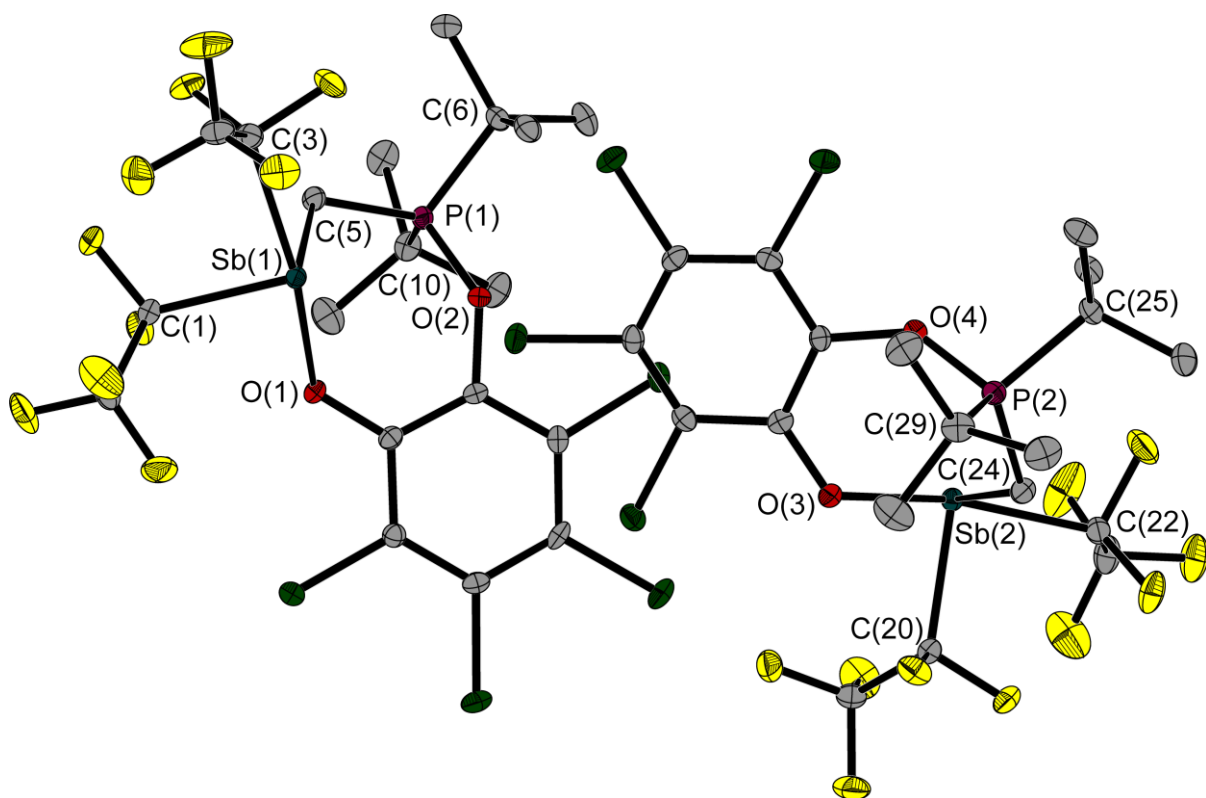

**Figure S48** Molecular structure of compound **10** in the solid state. Ellipsoids are set at 50 % probability; hydrogen atoms are omitted for clarity. Selected bond lengths [Å] and angles [°] for one of the two molecules in the asymmetric unit: Sb(1)–C(1) 2.242(2), Sb(1)–C(3) 2.316(2), Sb(1)–C(5) 2.186(2), Sb(1)–O(1) 2.316(1), P(1)–C(5) 1.782(2), P(1)–C(6) 1.847(2), P(1)–C(10) 1.848(2), P(1)–O(2) 1.593(1); C(1)–Sb(1)–C(3) 90.2(1), C(1)–Sb(1)–C(5) 92.4(1), C(5)–Sb(1)–C(3) 83.5(1), O(1)–Sb(1)–C(1) 78.4(1), O(1)–Sb(1)–C(3) 156.8(1), O(1)–Sb(1)–C(5) 77.0(1), C(5)–P(1)–C(6) 108.2(1), C(5)–P(1)–C(10) 111.0(1), C(6)–P(1)–C(10) 116.3(1), O(2)–P(1)–C(5) 111.4(1), O(2)–P(1)–C(6) 99.2(1), O(2)–P(1)–C(10) 110.2(1), P(1)–C(5)–Sb(1) 113.6(1).

### X-Ray Diffraction Studies

Single crystals were examined on a Rigaku Supernova diffractometer. Using Olex2,<sup>2</sup> the structure was solved with the ShelXT<sup>3</sup> structure solution program using Intrinsic Phasing and refined with the ShelXL<sup>4</sup> refinement package using Least Squares minimisation.

The structure of **4** was solved with the ShelXS<sup>5</sup> structure solution program using Direct Methods and also refined with ShelXL<sup>4</sup> refinement package using Least Square minimisation.

A solution of **2** in *n*-hexane was cooled to  $-78$  °C, whereupon colourless needle-shaped crystals suitable for diffraction experiments formed.

Beige crystals of **3** precipitated from a solution in toluene at 0 °C. Pseudo merohedral twin 1 0 0 0 -1 0 0 0 -1 2, BASF 0.14

Single crystals of **4** (colourless) and **5** (yellow) were received from saturated solutions in cyclopentane at  $-20$  °C.

Single crystals of **6** (colourless), **9** (orange) and **10** (colourless) were received from saturated solutions in C<sub>6</sub>D<sub>6</sub>.

Recrystallisation of **7** and **8** in *n*-hexane led to single crystals (**7**: yellow, **8**: orange) suitable for diffraction experiments.

CCDC 2350426-2350434 contain the supplementary crystallographic data for this paper. These data can be obtained free of charge from The Cambridge Crystallographic Data Centre via <http://www.ccdc.cam.ac.uk/conts/retrieving.html>

|                                                                                      | <b>2</b> <sup>[a]</sup>                              | <b>3</b> <sup>[b]</sup>                              | <b>4</b>                                              |
|--------------------------------------------------------------------------------------|------------------------------------------------------|------------------------------------------------------|-------------------------------------------------------|
| Empirical formula                                                                    | C <sub>13</sub> H <sub>20</sub> OF <sub>10</sub> PSb | C <sub>13</sub> H <sub>20</sub> F <sub>10</sub> PSSb | C <sub>13</sub> H <sub>20</sub> F <sub>10</sub> PSbSe |
| <i>M<sub>r</sub></i>                                                                 | 535.01                                               | 551.07                                               | 597.97                                                |
| $\lambda$ [Å]                                                                        | 0.71073                                              | 0.71073                                              | 0.71073                                               |
| <i>T</i> [K]                                                                         | 100.0(1)                                             | 100.0(1)                                             | 100.0(1)                                              |
| <i>F</i> (000) [ <i>e</i> ]                                                          | 1048                                                 | 1080                                                 | 1152                                                  |
| Crystal system                                                                       | triclinic                                            | monoclinic                                           | orthorhombic                                          |
| Space group                                                                          | <i>P</i> $\bar{1}$                                   | <i>P</i> 2 <sub>1</sub>                              | <i>P</i> 2 <sub>1</sub> 2 <sub>1</sub> 2 <sub>1</sub> |
| <i>a</i> [Å]                                                                         | 10.6777(2)                                           | 6.5700(1)                                            | 6.71696(7)                                            |
| <i>b</i> [Å]                                                                         | 11.9730(3)                                           | 24.8020(4)                                           | 11.89385(1)                                           |
| <i>c</i> [Å]                                                                         | 15.3503(3)                                           | 11.8819(2)                                           | 24.6205(2)                                            |
| $\alpha$ [°]                                                                         | 87.221(2)                                            | 90                                                   | 90                                                    |
| $\beta$ [°]                                                                          | 89.312(2)                                            | 90.318(2)                                            | 90                                                    |
| $\gamma$ [°]                                                                         | 77.017(2)                                            | 90                                                   | 90                                                    |
| <i>V</i> [Å <sup>3</sup> ]                                                           | 1910.03(7)                                           | 1936.12(5)                                           | 1966.94(3)                                            |
| <i>Z</i>                                                                             | 4                                                    | 4                                                    | 4                                                     |
| $\rho_{\text{calcd.}}$ [g cm <sup>-3</sup> ]                                         | 1.861                                                | 1.891                                                | 2.019                                                 |
| $\mu$ [mm <sup>-1</sup> ]                                                            | 1.621                                                | 1.702                                                | 3.420                                                 |
| 2 $\theta$ range [°]                                                                 | 3.494–64.092                                         | 3.284–63.894                                         | 3.804–64.422                                          |
| Index ranges <i>h</i>                                                                | –15 ≤ <i>h</i> ≤ 15                                  | –9 ≤ <i>h</i> ≤ 9                                    | –10 ≤ <i>h</i> ≤ 9                                    |
| Index ranges <i>k</i>                                                                | –17 ≤ <i>k</i> ≤ 17                                  | –36 ≤ <i>k</i> ≤ 35                                  | –17 ≤ <i>k</i> ≤ 17                                   |
| Index ranges <i>l</i>                                                                | –22 ≤ <i>l</i> ≤ 22                                  | –17 ≤ <i>l</i> ≤ 17                                  | –36 ≤ <i>l</i> ≤ 36                                   |
| Reflexes collected                                                                   | 116799                                               | 38299                                                | 120071                                                |
| Independent reflexes                                                                 | 20644                                                | 12310                                                | 6704                                                  |
| <i>R</i> <sub>int</sub>                                                              | 0.0270                                               | 0.0249                                               | 0.0363                                                |
| Observed reflexes,<br><i>I</i> > 2 $\sigma$ ( <i>I</i> )                             | 17695                                                | 12238                                                | 6490                                                  |
| Data/restraints/<br>parameters                                                       | 20644/0/482                                          | 12310/1/482                                          | 6704/0/241                                            |
| <i>R</i> <sub>1</sub> / <i>wR</i> <sub>2</sub> [ <i>I</i> > 2 $\sigma$ ( <i>I</i> )] | 0.0376/0.0926                                        | 0.0261/0.0650                                        | 0.0156/0.0304                                         |
| <i>R</i> <sub>1</sub> / <i>wR</i> <sub>2</sub> (all data)                            | 0.0452/0.0947                                        | 0.0265/0.0659                                        | 0.0175/0.0308                                         |
| <i>GoF</i> on <i>F</i> <sup>2</sup>                                                  | 1.053                                                | 1.079                                                | 1.072                                                 |
| $\rho_{\text{max}}/\rho_{\text{min}}$ [ <i>e</i> Å <sup>-3</sup> ]                   | 2.15/–1.08                                           | 1.01/–1.04                                           | 0.54/–0.31                                            |
| Flack parameter                                                                      |                                                      | –0.008(5)                                            | 0.0308(19)                                            |
| CCDC number                                                                          | 2350426                                              | 2350427                                              | 2350428                                               |

[a] Twinned crystal, component 2 rotated by –179.9° around [0.01 0.03 1.00] (reciprocal) or [–0.00 –0.01 1.00] (direct), BASF 0.2505(5). [b] Pseudo merohedral twin, Matrix 1 0 0 0 –1 0 0 0 0 –1, ratio 86:14



|                                                                                      | 5                                                     | 6                                                                                  | 7                                                                                   |
|--------------------------------------------------------------------------------------|-------------------------------------------------------|------------------------------------------------------------------------------------|-------------------------------------------------------------------------------------|
| Empirical formula                                                                    | C <sub>13</sub> H <sub>20</sub> F <sub>10</sub> PSbTe | C <sub>19</sub> H <sub>20</sub> Cl <sub>4</sub> F <sub>10</sub> O <sub>3</sub> PSb | C <sub>19</sub> H <sub>20</sub> Cl <sub>4</sub> F <sub>10</sub> O <sub>2</sub> PSSb |
| <i>M<sub>r</sub></i>                                                                 | 646.61                                                | 780.87                                                                             | 796.93                                                                              |
| $\lambda$ [Å]                                                                        | 0.71073                                               | 0.71073                                                                            | 0.71073                                                                             |
| <i>T</i> [K]                                                                         | 100.0(1)                                              | 100.0(1)                                                                           | 99.9(3)                                                                             |
| <i>F</i> (000) [ <i>e</i> ]                                                          | 612                                                   | 764                                                                                | 4680                                                                                |
| Crystal system                                                                       | triclinic                                             | triclinic                                                                          | monoclinic                                                                          |
| Space group                                                                          | <i>P</i> $\bar{1}$                                    | <i>P</i> $\bar{1}$                                                                 | <i>P</i> 2 <sub>1</sub> / <i>c</i>                                                  |
| <i>a</i> [Å]                                                                         | 8.5637(2)                                             | 10.4459(2)                                                                         | 8.83394(11)                                                                         |
| <i>b</i> [Å]                                                                         | 11.6657(3)                                            | 11.2266(2)                                                                         | 19.19795(19)                                                                        |
| <i>c</i> [Å]                                                                         | 11.7952(3)                                            | 12.8446(3)                                                                         | 49.5311(5)                                                                          |
| $\alpha$ [°]                                                                         | 93.533(2)                                             | 87.019(2)                                                                          | 90                                                                                  |
| $\beta$ [°]                                                                          | 106.833(2)                                            | 72.235(2)                                                                          | 91.4434(10)                                                                         |
| $\gamma$ [°]                                                                         | 110.076(2)                                            | 68.647(2)                                                                          | 90                                                                                  |
| <i>V</i> [Å <sup>3</sup> ]                                                           | 1042.20(5)                                            | 1333.05(5)                                                                         | 8397.50(16)                                                                         |
| <i>Z</i>                                                                             | 2                                                     | 2                                                                                  | 12                                                                                  |
| $\rho_{\text{calcd.}}$ [g cm <sup>-3</sup> ]                                         | 2.060                                                 | 1.945                                                                              | 1.891                                                                               |
| $\mu$ [mm <sup>-1</sup> ]                                                            | 2.853                                                 | 1.588                                                                              | 1.584                                                                               |
| 2 $\theta$ range [°]                                                                 | 3.666–64.26                                           | 3.336–64.7                                                                         | 5.078–60.068                                                                        |
| Index ranges <i>h</i>                                                                | -12 ≤ <i>h</i> ≤ 12                                   | -15 ≤ <i>h</i> ≤ 15                                                                | -12 ≤ <i>h</i> ≤ 12                                                                 |
| Index ranges <i>k</i>                                                                | -17 ≤ <i>k</i> ≤ 17                                   | -16 ≤ <i>k</i> ≤ 16                                                                | -27 ≤ <i>k</i> ≤ 27                                                                 |
| Index ranges <i>l</i>                                                                | -17 ≤ <i>l</i> ≤ 17                                   | -19 ≤ <i>l</i> ≤ 19                                                                | -69 ≤ <i>l</i> ≤ 69                                                                 |
| Reflexes collected                                                                   | 31255                                                 | 83450                                                                              | 162456                                                                              |
| Independent reflexes                                                                 | 6853                                                  | 8894                                                                               | 24488                                                                               |
| <i>R</i> <sub>int</sub>                                                              | 0.0344                                                | 0.0466                                                                             | 0.0700                                                                              |
| Observed reflexes,<br><i>I</i> > 2 $\sigma$ ( <i>I</i> )                             | 6075                                                  | 8214                                                                               | 22879                                                                               |
| Data/restraints/<br>parameters                                                       | 6853/0/241                                            | 8894/0/349                                                                         | 24488/13/1039                                                                       |
| <i>R</i> <sub>1</sub> / <i>wR</i> <sub>2</sub> [ <i>I</i> > 2 $\sigma$ ( <i>I</i> )] | 0.0223/0.0455                                         | 0.0271/0.0673                                                                      | 0.0895/0.1561                                                                       |
| <i>R</i> <sub>1</sub> / <i>wR</i> <sub>2</sub> (all data)                            | 0.0271/0.0479                                         | 0.0309/0.0694                                                                      | 0.0956/0.1584                                                                       |
| <i>GoF</i> on <i>F</i> <sup>2</sup>                                                  | 1.036                                                 | 1.097                                                                              | 1.343                                                                               |
| $\rho_{\text{max}}/\rho_{\text{min}}$ [ <i>e</i> Å <sup>-3</sup> ]                   | 0.73/-0.90                                            | 1.40/-0.63                                                                         | 1.41/-2.55                                                                          |
| CCDC number                                                                          | 2350429                                               | 2350430                                                                            | 2350431                                                                             |

|                                                                                      | <b>8<sup>[c]</sup></b>                                                               | <b>9<sup>[d]</sup></b>                                                             | <b>10<sup>[e]</sup></b>                                                            |
|--------------------------------------------------------------------------------------|--------------------------------------------------------------------------------------|------------------------------------------------------------------------------------|------------------------------------------------------------------------------------|
| Empirical formula                                                                    | C <sub>19</sub> H <sub>20</sub> Cl <sub>4</sub> F <sub>10</sub> O <sub>2</sub> PSbSe | C <sub>25</sub> H <sub>20</sub> Cl <sub>8</sub> F <sub>10</sub> O <sub>4</sub> PSb | C <sub>19</sub> H <sub>20</sub> Cl <sub>4</sub> F <sub>10</sub> O <sub>2</sub> PSb |
| <i>M<sub>r</sub></i>                                                                 | 843.83                                                                               | 1010.73                                                                            | 764.87                                                                             |
| $\lambda$ [Å]                                                                        | 1.54184                                                                              | 0.71073                                                                            | 0.71073                                                                            |
| <i>T</i> [K]                                                                         | 100.0(1)                                                                             | 100.0(1)                                                                           | 100.0(1)                                                                           |
| <i>F</i> (000) [ <i>e</i> ]                                                          | 3264                                                                                 | 3952                                                                               | 1496                                                                               |
| Crystal system                                                                       | monoclinic                                                                           | monoclinic                                                                         | triclinic                                                                          |
| Space group                                                                          | <i>P</i> 2 <sub>1</sub> / <i>c</i>                                                   | <i>P</i> 2 <sub>1</sub> / <i>c</i>                                                 | <i>P</i> $\bar{1}$                                                                 |
| <i>a</i> [Å]                                                                         | 15.5087(4)                                                                           | 11.25738(7)                                                                        | 11.9408(3)                                                                         |
| <i>b</i> [Å]                                                                         | 17.1296(4)                                                                           | 38.60501(18)                                                                       | 14.7066(4)                                                                         |
| <i>c</i> [Å]                                                                         | 21.3832(7)                                                                           | 16.16983(12)                                                                       | 17.0446(4)                                                                         |
| $\alpha$ [°]                                                                         | 90                                                                                   | 90                                                                                 | 77.029(2)                                                                          |
| $\beta$ [°]                                                                          | 94.395(3)                                                                            | 99.9478(7)                                                                         | 70.351(2)                                                                          |
| $\gamma$ [°]                                                                         | 90                                                                                   | 90                                                                                 | 69.951(2)                                                                          |
| <i>V</i> [Å <sup>3</sup> ]                                                           | 5663.9(3)                                                                            | 6921.62(8)                                                                         | 2627.82(13)                                                                        |
| <i>Z</i>                                                                             | 8                                                                                    | 8                                                                                  | 4                                                                                  |
| $\rho_{\text{calcd.}}$ [g cm <sup>-3</sup> ]                                         | 1.979                                                                                | 1.940                                                                              | 1.933                                                                              |
| $\mu$ [mm <sup>-1</sup> ]                                                            | 14.004                                                                               | 1.549                                                                              | 1.606                                                                              |
| 2 $\theta$ range [°]                                                                 | 5.716–136.496                                                                        | 3.316–60.066                                                                       | 2.97–64.456                                                                        |
| Index ranges <i>h</i>                                                                | -12 ≤ <i>h</i> ≤ 18                                                                  | -15 ≤ <i>h</i> ≤ 15                                                                | -17 ≤ <i>h</i> ≤ 17                                                                |
| Index ranges <i>k</i>                                                                | -20 ≤ <i>k</i> ≤ 20                                                                  | -54 ≤ <i>k</i> ≤ 54                                                                | -21 ≤ <i>k</i> ≤ 21                                                                |
| Index ranges <i>l</i>                                                                | -25 ≤ <i>l</i> ≤ 25                                                                  | -22 ≤ <i>l</i> ≤ 22                                                                | -25 ≤ <i>l</i> ≤ 25                                                                |
| Reflexes collected                                                                   | 46220                                                                                | 279858                                                                             | 94844                                                                              |
| Independent reflexes                                                                 | 10305                                                                                | 20241                                                                              | 20292                                                                              |
| <i>R</i> <sub>int</sub>                                                              | 0.0790                                                                               | 0.0455                                                                             | 0.0326                                                                             |
| Observed reflexes,<br><i>I</i> > 2 $\sigma$ ( <i>I</i> )                             | 8829                                                                                 | 18660                                                                              | 17011                                                                              |
| Data/restraints/<br>parameters                                                       | 10305/0/698                                                                          | 20241/10/977                                                                       | 20292/0/680                                                                        |
| <i>R</i> <sub>1</sub> / <i>wR</i> <sub>2</sub> [ <i>I</i> > 2 $\sigma$ ( <i>I</i> )] | 0.0580/0.1514                                                                        | 0.0526/0.1179                                                                      | 0.0220/0.0469                                                                      |
| <i>R</i> <sub>1</sub> / <i>wR</i> <sub>2</sub> (all data)                            | 0.0665/0.1602                                                                        | 0.0571/0.1199                                                                      | 0.0291/0.0479                                                                      |
| <i>GoF</i> on <i>F</i> <sup>2</sup>                                                  | 1.058                                                                                | 1.217                                                                              | 0.897                                                                              |
| $\rho_{\text{max}}/\rho_{\text{min}}$ [ <i>e</i> Å <sup>-3</sup> ]                   | 1.61/-1.98                                                                           | 1.74/-0.91                                                                         | 0.92/-0.47                                                                         |
| CCDC number                                                                          | 2350432                                                                              | 2350433                                                                            | 2350434                                                                            |

[c] Small crystal and weak diffraction with Mo radiation, therefore, Cu radiation was used. [d] Disorder of C(29), F(17) to F(20), C(30), C(32), C(34) and C(36) over two sides (72:28). Suitable restraints and constraints were applied for disordered atoms. [e] Twinned crystal, component 2 rotated by -180.0° around [-0.32 0.01 0.95] (reciprocal) or [-0.71 0.00 0.71] (direct), ratio 60:40.

## References

- 1 J. Kriefft, P. C. Trapp, Y. V. Vishnevskiy, B. Neumann, H.-G. Stammer and N. W. Mitzel, *Chem. Sci.* 2024, *in press*.
- 2 O. V. Dolomanov, L. J. Bourhis, R. J. Gildea, J. A. K. Howard and H. Puschmann, *J. Appl. Crystallogr.*, 2009, **42**, 339–341.
- 3 G. M. Sheldrick, *Acta Crystallogr., Sect. A*, 2015, **71**, 3–8.
- 4 G. M. Sheldrick, *Acta Crystallogr., Sect. C*, 2015, **71**, 3–8.
- 5 G. M. Sheldrick, *Acta Crystallogr., Sect. A*, 2008, **64**, 112–122.
